# Supplementary material
Source: publisher figshare collection journal article supplement (https://acs.figshare.com/ndownloader/files/3989137)
Supplement: Supplementary file 1 [file 3989137]

 
data_I 
 
_audit_creation_method            SHELXL-97 
_chemical_name_systematic 
; 
 ? 
; 
_chemical_name_common             ? 
_chemical_melting_point           ? 
_chemical_formula_moiety          'C54 H42 Al P3'
_chemical_formula_sum             'C54 H42 Al P3' 
_chemical_formula_weight          810.77 
 
loop_ 
 _atom_type_symbol 
 _atom_type_description 
 _atom_type_scat_dispersion_real 
 _atom_type_scat_dispersion_imag 
 _atom_type_scat_source 
 'C'  'C'   0.0033   0.0016 
 'International Tables Vol C Tables 4.2.6.8 and 6.1.1.4' 
 'H'  'H'   0.0000   0.0000 
 'International Tables Vol C Tables 4.2.6.8 and 6.1.1.4' 
 'Al'  'Al'   0.0645   0.0514 
 'International Tables Vol C Tables 4.2.6.8 and 6.1.1.4' 
 'P'  'P'   0.1023   0.0942 
 'International Tables Vol C Tables 4.2.6.8 and 6.1.1.4' 
 
_symmetry_cell_setting            triclinic 
_symmetry_space_group_name_H-M    'P -1' 
_symmetry_space_group_name_HALL   '-P 1'
 
loop_ 
 _symmetry_equiv_pos_as_xyz 
 'x, y, z' 
 '-x, -y, -z' 
 
_cell_length_a                    11.0020(2) 
_cell_length_b                    13.1765(2) 
_cell_length_c                    31.9414(6) 
_cell_angle_alpha                 87.5550(10) 
_cell_angle_beta                  82.8900(10) 
_cell_angle_gamma                 77.3160(10) 
_cell_volume                      4482.16(14) 
_cell_formula_units_Z             4 
_cell_measurement_temperature     150(2) 
_cell_measurement_reflns_used     9852 
_cell_measurement_theta_min       2.4 
_cell_measurement_theta_max       25.8 
 
_exptl_crystal_description        block 
_exptl_crystal_colour             colorless 
_exptl_crystal_size_max           0.20 
_exptl_crystal_size_mid           0.16 
_exptl_crystal_size_min           0.06 
_exptl_crystal_density_meas       ? 
_exptl_crystal_density_diffrn     1.201 
_exptl_crystal_density_method     'not measured' 
_exptl_crystal_F_000              1696 
_exptl_absorpt_coefficient_mu     0.188 
_exptl_absorpt_correction_type    multi-scan 
_exptl_absorpt_correction_T_min   0.965 
_exptl_absorpt_correction_T_max   0.9888 
_exptl_absorpt_process_details    'SADABS (Sheldrick, 1996)' 
 
_exptl_special_details 
; 
 ? 
; 
 
_diffrn_ambient_temperature       150(2) 
_diffrn_radiation_wavelength      0.71073 
_diffrn_radiation_type            MoK\a 
_diffrn_radiation_source          'fine-focus sealed tube' 
_diffrn_radiation_monochromator   graphite 
_diffrn_measurement_device_type   'Bruker APEX II CCD area detector' 
_diffrn_measurement_method        'phi and omega scans' 
_diffrn_detector_area_resol_mean  ? 
_diffrn_reflns_number             18131 
_diffrn_reflns_av_R_equivalents   0.0000 
_diffrn_reflns_av_sigmaI/netI     0.0638 
_diffrn_reflns_limit_h_min        -13 
_diffrn_reflns_limit_h_max        13 
_diffrn_reflns_limit_k_min        -16 
_diffrn_reflns_limit_k_max        16 
_diffrn_reflns_limit_l_min        0 
_diffrn_reflns_limit_l_max        39 
_diffrn_reflns_theta_min          1.91 
_diffrn_reflns_theta_max          26.38 
_reflns_number_total              18131 
_reflns_number_gt                 12258 
_reflns_threshold_expression      >2sigma(I) 
 
_computing_data_collection        'SMART (Bruker, 2007)' 
_computing_cell_refinement        'SMART' 
_computing_data_reduction         'SAINT+ (Bruker, 2007)' 
_computing_structure_solution     'SHELXS-97 (Sheldrick, 2008)' 
_computing_structure_refinement   'SHELXL-97 (Sheldrick, 2008)' 
_computing_molecular_graphics     'SHELXTL (Bruker, 2007)' 
_computing_publication_material   SHELXTL 
 
_refine_special_details 
; 
 Refinement of F^2^ against ALL reflections.  The weighted R-factor wR and 
 goodness of fit S are based on F^2^, conventional R-factors R are based 
 on F, with F set to zero for negative F^2^. The threshold expression of 
 F^2^ > 2sigma(F^2^) is used only for calculating R-factors(gt) etc. and is 
 not relevant to the choice of reflections for refinement.  R-factors based 
 on F^2^ are statistically about twice as large as those based on F, and R- 
 factors based on ALL data will be even larger. 
; 
 
_refine_ls_structure_factor_coef  Fsqd  
_refine_ls_matrix_type            full 
_refine_ls_weighting_scheme       calc  
_refine_ls_weighting_details 
 'calc w=1/[\s^2^(Fo^2^)+(0.0692P)^2^+0.5661P] where P=(Fo^2^+2Fc^2^)/3' 
_atom_sites_solution_primary      direct 
_atom_sites_solution_secondary    difmap 
_atom_sites_solution_hydrogens    geom 
_refine_ls_hydrogen_treatment     constr 
_refine_ls_extinction_method      none 
_refine_ls_extinction_coef        ? 
_refine_ls_number_reflns          18131 
_refine_ls_number_parameters      1045 
_refine_ls_number_restraints      0 
_refine_ls_R_factor_all           0.0878 
_refine_ls_R_factor_gt            0.0526 
_refine_ls_wR_factor_ref          0.1402 
_refine_ls_wR_factor_gt           0.1277 
_refine_ls_goodness_of_fit_ref    1.049 
_refine_ls_restrained_S_all       1.049 
_refine_ls_shift/su_max           0.001 
_refine_ls_shift/su_mean          0.000 
 
loop_ 
 _atom_site_label 
 _atom_site_type_symbol 
 _atom_site_fract_x 
 _atom_site_fract_y 
 _atom_site_fract_z 
 _atom_site_U_iso_or_equiv 
 _atom_site_adp_type 
 _atom_site_occupancy 
 _atom_site_symmetry_multiplicity 
 _atom_site_calc_flag 
 _atom_site_refinement_flags 
 _atom_site_disorder_assembly 
 _atom_site_disorder_group 
P1 P 0.59347(5) 0.87717(5) 0.088156(19) 0.02562(15) Uani 1 1 d . . . 
P2 P 1.01548(6) 0.81922(5) 0.15678(2) 0.03289(17) Uani 1 1 d . . . 
P3 P 0.96419(5) 0.55047(4) 0.109767(18) 0.02326(15) Uani 1 1 d . . . 
P4 P 0.39254(6) 0.37421(5) 0.34762(2) 0.03031(16) Uani 1 1 d . . . 
P5 P 0.59127(6) 0.06725(6) 0.34866(2) 0.04018(19) Uani 1 1 d . . . 
P6 P 0.13463(6) 0.08896(5) 0.40433(2) 0.03143(16) Uani 1 1 d . . . 
Al1 Al 0.79285(6) 0.72497(5) 0.11493(2) 0.02484(17) Uani 1 1 d . . . 
Al2 Al 0.28758(7) 0.20683(6) 0.36808(2) 0.03146(19) Uani 1 1 d . . . 
C1 C 0.4807(2) 0.84024(16) 0.05793(7) 0.0237(5) Uani 1 1 d . . . 
C2 C 0.3648(2) 0.83067(18) 0.07927(8) 0.0314(6) Uani 1 1 d . . . 
H2 H 0.3458 0.8472 0.1083 0.038 Uiso 1 1 calc R . . 
C3 C 0.2778(2) 0.79768(19) 0.05882(9) 0.0370(6) Uani 1 1 d . . . 
H3 H 0.1988 0.7930 0.0736 0.044 Uiso 1 1 calc R . . 
C4 C 0.3055(2) 0.77131(19) 0.01665(9) 0.0364(6) Uani 1 1 d . . . 
H4 H 0.2456 0.7483 0.0025 0.044 Uiso 1 1 calc R . . 
C5 C 0.4201(2) 0.77859(19) -0.00472(8) 0.0341(6) Uani 1 1 d . . . 
H5 H 0.4395 0.7598 -0.0336 0.041 Uiso 1 1 calc R . . 
C6 C 0.5070(2) 0.81324(17) 0.01572(7) 0.0282(5) Uani 1 1 d . . . 
H6 H 0.5855 0.8186 0.0007 0.034 Uiso 1 1 calc R . . 
C7 C 0.5283(2) 1.01470(17) 0.10024(7) 0.0266(5) Uani 1 1 d . . . 
C8 C 0.6017(2) 1.0644(2) 0.12147(8) 0.0371(6) Uani 1 1 d . . . 
H8 H 0.6802 1.0266 0.1289 0.044 Uiso 1 1 calc R . . 
C9 C 0.5614(3) 1.1679(2) 0.13178(8) 0.0417(7) Uani 1 1 d . . . 
H9 H 0.6123 1.2007 0.1462 0.050 Uiso 1 1 calc R . . 
C10 C 0.4482(3) 1.2237(2) 0.12137(8) 0.0414(7) Uani 1 1 d . . . 
H10 H 0.4206 1.2949 0.1287 0.050 Uiso 1 1 calc R . . 
C11 C 0.3747(2) 1.1762(2) 0.10029(9) 0.0442(7) Uani 1 1 d . . . 
H11 H 0.2966 1.2149 0.0929 0.053 Uiso 1 1 calc R . . 
C12 C 0.4142(2) 1.07138(19) 0.08975(8) 0.0354(6) Uani 1 1 d . . . 
H12 H 0.3627 1.0389 0.0754 0.043 Uiso 1 1 calc R . . 
C13 C 0.7332(2) 0.87934(17) 0.05170(7) 0.0256(5) Uani 1 1 d . . . 
C14 C 0.7431(2) 0.94518(19) 0.01647(8) 0.0339(6) Uani 1 1 d . . . 
H14 H 0.6721 0.9960 0.0098 0.041 Uiso 1 1 calc R . . 
C15 C 0.8555(2) 0.9359(2) -0.00828(8) 0.0382(6) Uani 1 1 d . . . 
H15 H 0.8626 0.9802 -0.0323 0.046 Uiso 1 1 calc R . . 
C16 C 0.9594(2) 0.8618(2) 0.00162(8) 0.0387(6) Uani 1 1 d . . . 
H16 H 1.0371 0.8549 -0.0158 0.046 Uiso 1 1 calc R . . 
C17 C 0.9497(2) 0.79825(18) 0.03675(8) 0.0299(6) Uani 1 1 d . . . 
H17 H 1.0216 0.7483 0.0432 0.036 Uiso 1 1 calc R . . 
C18 C 0.8371(2) 0.80527(16) 0.06314(7) 0.0238(5) Uani 1 1 d . . . 
C19 C 0.7872(2) 0.76286(17) 0.17444(7) 0.0254(5) Uani 1 1 d . . . 
C20 C 0.6820(2) 0.74929(19) 0.20214(8) 0.0335(6) Uani 1 1 d . . . 
H20 H 0.6113 0.7359 0.1908 0.040 Uiso 1 1 calc R . . 
C21 C 0.6783(2) 0.75480(19) 0.24527(8) 0.0369(6) Uani 1 1 d . . . 
H21 H 0.6047 0.7474 0.2630 0.044 Uiso 1 1 calc R . . 
C22 C 0.7806(2) 0.77092(19) 0.26293(8) 0.0359(6) Uani 1 1 d . . . 
H22 H 0.7797 0.7706 0.2927 0.043 Uiso 1 1 calc R . . 
C23 C 0.8848(2) 0.78765(19) 0.23668(7) 0.0344(6) Uani 1 1 d . . . 
H23 H 0.9550 0.8003 0.2485 0.041 Uiso 1 1 calc R . . 
C24 C 0.8870(2) 0.78600(18) 0.19314(7) 0.0286(5) Uani 1 1 d . . . 
C25 C 1.1478(2) 0.7827(2) 0.18826(8) 0.0328(6) Uani 1 1 d . . . 
C26 C 1.1935(3) 0.6764(2) 0.19444(10) 0.0522(8) Uani 1 1 d . . . 
H26 H 1.1561 0.6281 0.1822 0.063 Uiso 1 1 calc R . . 
C27 C 1.2913(3) 0.6401(2) 0.21771(11) 0.0613(9) Uani 1 1 d . . . 
H27 H 1.3192 0.5674 0.2222 0.074 Uiso 1 1 calc R . . 
C28 C 1.3484(3) 0.7083(3) 0.23442(10) 0.0594(9) Uani 1 1 d . . . 
H28 H 1.4170 0.6829 0.2501 0.071 Uiso 1 1 calc R . . 
C29 C 1.3074(3) 0.8134(2) 0.22864(10) 0.0552(8) Uani 1 1 d . . . 
H29 H 1.3472 0.8607 0.2405 0.066 Uiso 1 1 calc R . . 
C30 C 1.2071(2) 0.8506(2) 0.20533(9) 0.0427(7) Uani 1 1 d . . . 
H30 H 1.1792 0.9235 0.2012 0.051 Uiso 1 1 calc R . . 
C31 C 0.9777(2) 0.9615(2) 0.15931(8) 0.0364(6) Uani 1 1 d . . . 
C32 C 1.0519(3) 1.0176(3) 0.13427(11) 0.0714(10) Uani 1 1 d . . . 
H32 H 1.1213 0.9816 0.1160 0.086 Uiso 1 1 calc R . . 
C33 C 1.0273(4) 1.1262(3) 0.13514(14) 0.0898(13) Uani 1 1 d . . . 
H33 H 1.0798 1.1629 0.1176 0.108 Uiso 1 1 calc R . . 
C34 C 0.9288(4) 1.1793(3) 0.16091(12) 0.0684(10) Uani 1 1 d . . . 
H34 H 0.9142 1.2530 0.1621 0.082 Uiso 1 1 calc R . . 
C35 C 0.8501(3) 1.1265(2) 0.18529(9) 0.0519(8) Uani 1 1 d . . . 
H35 H 0.7790 1.1638 0.2025 0.062 Uiso 1 1 calc R . . 
C36 C 0.8747(3) 1.0192(2) 0.18470(8) 0.0432(7) Uani 1 1 d . . . 
H36 H 0.8204 0.9835 0.2020 0.052 Uiso 1 1 calc R . . 
C37 C 0.7202(2) 0.60082(18) 0.10773(7) 0.0245(5) Uani 1 1 d . . . 
C38 C 0.5991(2) 0.5836(2) 0.10743(7) 0.0341(6) Uani 1 1 d . . . 
H38 H 0.5291 0.6406 0.1115 0.041 Uiso 1 1 calc R . . 
C39 C 0.5791(3) 0.4857(2) 0.10131(8) 0.0414(7) Uani 1 1 d . . . 
H39 H 0.4958 0.4766 0.1013 0.050 Uiso 1 1 calc R . . 
C40 C 0.6781(3) 0.4009(2) 0.09516(8) 0.0432(7) Uani 1 1 d . . . 
H40 H 0.6631 0.3344 0.0902 0.052 Uiso 1 1 calc R . . 
C41 C 0.7997(3) 0.41313(19) 0.09628(7) 0.0362(6) Uani 1 1 d . . . 
H41 H 0.8684 0.3550 0.0929 0.043 Uiso 1 1 calc R . . 
C42 C 0.8197(2) 0.51183(18) 0.10243(7) 0.0250(5) Uani 1 1 d . . . 
C43 C 1.0177(2) 0.47754(17) 0.15653(7) 0.0241(5) Uani 1 1 d . . . 
C44 C 0.9415(2) 0.49792(19) 0.19448(7) 0.0313(6) Uani 1 1 d . . . 
H44 H 0.8629 0.5457 0.1951 0.038 Uiso 1 1 calc R . . 
C45 C 0.9785(2) 0.4496(2) 0.23137(8) 0.0376(6) Uani 1 1 d . . . 
H45 H 0.9248 0.4636 0.2571 0.045 Uiso 1 1 calc R . . 
C46 C 1.0922(2) 0.3815(2) 0.23115(8) 0.0401(7) Uani 1 1 d . . . 
H46 H 1.1180 0.3494 0.2567 0.048 Uiso 1 1 calc R . . 
C47 C 1.1684(3) 0.3598(2) 0.19415(8) 0.0452(7) Uani 1 1 d . . . 
H47 H 1.2468 0.3119 0.1940 0.054 Uiso 1 1 calc R . . 
C48 C 1.1317(2) 0.40771(19) 0.15658(8) 0.0368(6) Uani 1 1 d . . . 
H48 H 1.1852 0.3923 0.1309 0.044 Uiso 1 1 calc R . . 
C49 C 1.0898(2) 0.50343(17) 0.06823(7) 0.0245(5) Uani 1 1 d . . . 
C50 C 1.0870(2) 0.4305(2) 0.03886(8) 0.0378(6) Uani 1 1 d . . . 
H50 H 1.0146 0.4023 0.0391 0.045 Uiso 1 1 calc R . . 
C51 C 1.1902(3) 0.3980(2) 0.00883(8) 0.0477(7) Uani 1 1 d . . . 
H51 H 1.1878 0.3471 -0.0111 0.057 Uiso 1 1 calc R . . 
C52 C 1.2942(3) 0.4384(2) 0.00775(8) 0.0400(7) Uani 1 1 d . . . 
H52 H 1.3638 0.4159 -0.0129 0.048 Uiso 1 1 calc R . . 
C53 C 1.2988(2) 0.5119(2) 0.03663(8) 0.0400(7) Uani 1 1 d . . . 
H53 H 1.3714 0.5401 0.0360 0.048 Uiso 1 1 calc R . . 
C54 C 1.1966(2) 0.54415(19) 0.06642(8) 0.0357(6) Uani 1 1 d . . . 
H54 H 1.1995 0.5953 0.0861 0.043 Uiso 1 1 calc R . . 
C55 C 0.4787(2) 0.40787(18) 0.29831(8) 0.0308(6) Uani 1 1 d . . . 
C56 C 0.4664(3) 0.3571(2) 0.26188(8) 0.0420(7) Uani 1 1 d . . . 
H56 H 0.4116 0.3102 0.2633 0.050 Uiso 1 1 calc R . . 
C57 C 0.5339(3) 0.3752(2) 0.22365(9) 0.0494(8) Uani 1 1 d . . . 
H57 H 0.5248 0.3407 0.1991 0.059 Uiso 1 1 calc R . . 
C58 C 0.6138(3) 0.4424(2) 0.22115(9) 0.0463(7) Uani 1 1 d . . . 
H58 H 0.6596 0.4547 0.1949 0.056 Uiso 1 1 calc R . . 
C59 C 0.6273(2) 0.4917(2) 0.25673(9) 0.0420(7) Uani 1 1 d . . . 
H59 H 0.6830 0.5379 0.2551 0.050 Uiso 1 1 calc R . . 
C60 C 0.5601(2) 0.47464(19) 0.29507(8) 0.0364(6) Uani 1 1 d . . . 
H60 H 0.5702 0.5094 0.3194 0.044 Uiso 1 1 calc R . . 
C61 C 0.4282(2) 0.45746(18) 0.38640(7) 0.0300(6) Uani 1 1 d . . . 
C62 C 0.5386(2) 0.4244(2) 0.40464(8) 0.0409(7) Uani 1 1 d . . . 
H62 H 0.5936 0.3605 0.3962 0.049 Uiso 1 1 calc R . . 
C63 C 0.5698(3) 0.4835(2) 0.43510(9) 0.0464(7) Uani 1 1 d . . . 
H63 H 0.6457 0.4599 0.4473 0.056 Uiso 1 1 calc R . . 
C64 C 0.4916(3) 0.5755(2) 0.44759(8) 0.0427(7) Uani 1 1 d . . . 
H64 H 0.5131 0.6156 0.4684 0.051 Uiso 1 1 calc R . . 
C65 C 0.3820(3) 0.6097(2) 0.42997(8) 0.0447(7) Uani 1 1 d . . . 
H65 H 0.3276 0.6736 0.4387 0.054 Uiso 1 1 calc R . . 
C66 C 0.3501(2) 0.5512(2) 0.39946(8) 0.0376(6) Uani 1 1 d . . . 
H66 H 0.2740 0.5757 0.3874 0.045 Uiso 1 1 calc R . . 
C67 C 0.2271(2) 0.41696(18) 0.34162(7) 0.0301(6) Uani 1 1 d . . . 
C68 C 0.1648(3) 0.51250(19) 0.32586(8) 0.0380(6) Uani 1 1 d . . . 
H68 H 0.2104 0.5631 0.3148 0.046 Uiso 1 1 calc R . . 
C69 C 0.0362(3) 0.5319(2) 0.32665(8) 0.0443(7) Uani 1 1 d . . . 
H69 H -0.0075 0.5968 0.3165 0.053 Uiso 1 1 calc R . . 
C70 C -0.0295(2) 0.4574(2) 0.34216(8) 0.0401(7) Uani 1 1 d . . . 
H70 H -0.1183 0.4722 0.3434 0.048 Uiso 1 1 calc R . . 
C71 C 0.0336(2) 0.3612(2) 0.35592(7) 0.0359(6) Uani 1 1 d . . . 
H71 H -0.0129 0.3101 0.3656 0.043 Uiso 1 1 calc R . . 
C72 C 0.1641(2) 0.33743(19) 0.35598(7) 0.0308(6) Uani 1 1 d . . . 
C73 C 0.3639(2) 0.13081(18) 0.31542(7) 0.0304(6) Uani 1 1 d . . . 
C74 C 0.4907(2) 0.08103(19) 0.30611(8) 0.0338(6) Uani 1 1 d . . . 
C75 C 0.5364(3) 0.0407(2) 0.26606(8) 0.0418(7) Uani 1 1 d . . . 
H75 H 0.6223 0.0073 0.2602 0.050 Uiso 1 1 calc R . . 
C76 C 0.4584(3) 0.0488(2) 0.23497(9) 0.0448(7) Uani 1 1 d . . . 
H76 H 0.4905 0.0218 0.2077 0.054 Uiso 1 1 calc R . . 
C77 C 0.3333(3) 0.0963(2) 0.24363(9) 0.0446(7) Uani 1 1 d . . . 
H77 H 0.2785 0.1019 0.2225 0.054 Uiso 1 1 calc R . . 
C78 C 0.2881(3) 0.13587(19) 0.28346(8) 0.0399(7) Uani 1 1 d . . . 
H78 H 0.2017 0.1678 0.2891 0.048 Uiso 1 1 calc R . . 
C79 C 0.6210(2) -0.0730(2) 0.35838(8) 0.0383(6) Uani 1 1 d . . . 
C80 C 0.5373(3) -0.1326(2) 0.34948(9) 0.0486(7) Uani 1 1 d . . . 
H80 H 0.4652 -0.1004 0.3364 0.058 Uiso 1 1 calc R . . 
C81 C 0.5576(3) -0.2383(3) 0.35935(10) 0.0586(8) Uani 1 1 d . . . 
H81 H 0.4992 -0.2773 0.3531 0.070 Uiso 1 1 calc R . . 
C82 C 0.6614(3) -0.2867(3) 0.37803(10) 0.0638(9) Uani 1 1 d . . . 
H82 H 0.6760 -0.3593 0.3841 0.077 Uiso 1 1 calc R . . 
C83 C 0.7441(3) -0.2295(3) 0.38792(9) 0.0596(9) Uani 1 1 d . . . 
H83 H 0.8156 -0.2628 0.4011 0.072 Uiso 1 1 calc R . . 
C84 C 0.7245(3) -0.1234(2) 0.37886(8) 0.0493(7) Uani 1 1 d . . . 
H84 H 0.7814 -0.0846 0.3866 0.059 Uiso 1 1 calc R . . 
C85 C 0.7384(2) 0.0896(2) 0.32073(8) 0.0372(6) Uani 1 1 d . . . 
C86 C 0.8442(2) 0.0160(2) 0.30594(8) 0.0403(7) Uani 1 1 d . . . 
H86 H 0.8446 -0.0559 0.3099 0.048 Uiso 1 1 calc R . . 
C87 C 0.9490(3) 0.0463(3) 0.28558(9) 0.0489(8) Uani 1 1 d . . . 
H87 H 1.0217 -0.0051 0.2766 0.059 Uiso 1 1 calc R . . 
C88 C 0.9495(3) 0.1490(3) 0.27812(10) 0.0582(9) Uani 1 1 d . . . 
H88 H 1.0209 0.1685 0.2629 0.070 Uiso 1 1 calc R . . 
C89 C 0.8465(3) 0.2247(3) 0.29270(11) 0.0594(9) Uani 1 1 d . . . 
H89 H 0.8470 0.2963 0.2881 0.071 Uiso 1 1 calc R . . 
C90 C 0.7429(3) 0.1949(2) 0.31406(10) 0.0526(8) Uani 1 1 d . . . 
H90 H 0.6726 0.2469 0.3246 0.063 Uiso 1 1 calc R . . 
C91 C 0.3201(2) 0.16215(18) 0.42648(8) 0.0312(6) Uani 1 1 d . . . 
C92 C 0.4028(2) 0.1833(2) 0.45361(8) 0.0395(6) Uani 1 1 d . . . 
H92 H 0.4563 0.2294 0.4443 0.047 Uiso 1 1 calc R . . 
C93 C 0.4081(2) 0.1389(2) 0.49335(8) 0.0428(7) Uani 1 1 d . . . 
H93 H 0.4646 0.1549 0.5110 0.051 Uiso 1 1 calc R . . 
C94 C 0.3312(2) 0.0707(2) 0.50775(9) 0.0439(7) Uani 1 1 d . . . 
H94 H 0.3359 0.0394 0.5350 0.053 Uiso 1 1 calc R . . 
C95 C 0.2481(2) 0.0487(2) 0.48233(8) 0.0434(7) Uani 1 1 d . . . 
H95 H 0.1954 0.0022 0.4920 0.052 Uiso 1 1 calc R . . 
C96 C 0.2420(2) 0.09488(19) 0.44256(8) 0.0317(6) Uani 1 1 d . . . 
C97 C -0.0208(2) 0.14616(17) 0.43065(7) 0.0277(5) Uani 1 1 d . . . 
C98 C -0.0369(2) 0.22169(19) 0.46107(8) 0.0356(6) Uani 1 1 d . . . 
H98 H 0.0346 0.2404 0.4698 0.043 Uiso 1 1 calc R . . 
C99 C -0.1551(2) 0.2699(2) 0.47874(8) 0.0400(7) Uani 1 1 d . . . 
H99 H -0.1648 0.3225 0.4991 0.048 Uiso 1 1 calc R . . 
C100 C -0.2601(2) 0.2416(2) 0.46676(8) 0.0392(7) Uani 1 1 d . . . 
H100 H -0.3416 0.2721 0.4799 0.047 Uiso 1 1 calc R . . 
C101 C -0.2451(2) 0.1687(2) 0.43557(8) 0.0398(7) Uani 1 1 d . . . 
H101 H -0.3165 0.1506 0.4265 0.048 Uiso 1 1 calc R . . 
C102 C -0.1267(2) 0.12229(19) 0.41766(8) 0.0363(6) Uani 1 1 d . . . 
H102 H -0.1174 0.0730 0.3960 0.044 Uiso 1 1 calc R . . 
C103 C 0.1228(2) -0.04449(19) 0.39695(8) 0.0338(6) Uani 1 1 d . . . 
C104 C 0.0673(3) -0.1015(2) 0.42829(8) 0.0422(7) Uani 1 1 d . . . 
H104 H 0.0408 -0.0725 0.4555 0.051 Uiso 1 1 calc R . . 
C105 C 0.0496(3) -0.1999(2) 0.42087(10) 0.0488(7) Uani 1 1 d . . . 
H105 H 0.0120 -0.2382 0.4427 0.059 Uiso 1 1 calc R . . 
C106 C 0.0876(3) -0.2413(2) 0.38112(11) 0.0512(8) Uani 1 1 d . . . 
H106 H 0.0739 -0.3078 0.3753 0.061 Uiso 1 1 calc R . . 
C107 C 0.1448(3) -0.1870(3) 0.35016(11) 0.0580(9) Uani 1 1 d . . . 
H107 H 0.1726 -0.2169 0.3232 0.070 Uiso 1 1 calc R . . 
C108 C 0.1627(2) -0.0882(2) 0.35777(9) 0.0438(7) Uani 1 1 d . . . 
H108 H 0.2023 -0.0510 0.3360 0.053 Uiso 1 1 calc R . . 
 
loop_ 
 _atom_site_aniso_label 
 _atom_site_aniso_U_11 
 _atom_site_aniso_U_22 
 _atom_site_aniso_U_33 
 _atom_site_aniso_U_23 
 _atom_site_aniso_U_13 
 _atom_site_aniso_U_12 
P1 0.0211(3) 0.0247(3) 0.0305(4) 0.0018(3) -0.0060(3) -0.0026(3) 
P2 0.0279(4) 0.0440(4) 0.0285(4) -0.0027(3) -0.0009(3) -0.0124(3) 
P3 0.0255(3) 0.0214(3) 0.0228(3) 0.0007(3) -0.0056(3) -0.0036(3) 
P4 0.0315(4) 0.0253(4) 0.0322(4) 0.0019(3) -0.0019(3) -0.0033(3) 
P5 0.0321(4) 0.0474(5) 0.0385(4) -0.0103(3) -0.0018(3) -0.0027(3) 
P6 0.0290(4) 0.0315(4) 0.0315(4) 0.0012(3) 0.0009(3) -0.0043(3) 
Al1 0.0247(4) 0.0267(4) 0.0248(4) 0.0003(3) -0.0042(3) -0.0085(3) 
Al2 0.0275(4) 0.0304(4) 0.0331(4) 0.0010(3) -0.0003(3) -0.0012(3) 
C1 0.0206(12) 0.0169(12) 0.0311(14) 0.0022(10) -0.0013(10) -0.0003(10) 
C2 0.0288(14) 0.0293(14) 0.0346(15) -0.0042(11) 0.0008(11) -0.0048(11) 
C3 0.0231(13) 0.0397(16) 0.0484(18) -0.0025(13) 0.0011(12) -0.0102(12) 
C4 0.0262(14) 0.0359(15) 0.0513(18) -0.0015(13) -0.0132(12) -0.0105(12) 
C5 0.0351(15) 0.0347(15) 0.0331(15) -0.0035(12) -0.0062(12) -0.0069(12) 
C6 0.0213(12) 0.0275(13) 0.0350(15) 0.0018(11) -0.0033(11) -0.0038(10) 
C7 0.0276(13) 0.0242(13) 0.0257(13) 0.0005(10) 0.0028(10) -0.0040(11) 
C8 0.0386(15) 0.0366(16) 0.0370(15) -0.0035(12) -0.0100(12) -0.0064(12) 
C9 0.0518(18) 0.0369(16) 0.0396(16) -0.0101(13) -0.0031(13) -0.0162(14) 
C10 0.0457(17) 0.0276(15) 0.0483(17) -0.0123(13) 0.0125(14) -0.0104(13) 
C11 0.0301(15) 0.0313(16) 0.065(2) -0.0066(14) 0.0030(14) 0.0032(12) 
C12 0.0256(13) 0.0316(15) 0.0483(16) -0.0059(12) -0.0015(12) -0.0052(11) 
C13 0.0230(12) 0.0235(13) 0.0313(13) 0.0010(10) -0.0051(10) -0.0067(10) 
C14 0.0263(14) 0.0309(14) 0.0444(16) 0.0119(12) -0.0115(12) -0.0042(11) 
C15 0.0360(15) 0.0371(16) 0.0433(16) 0.0201(13) -0.0068(13) -0.0144(13) 
C16 0.0235(13) 0.0490(17) 0.0423(16) 0.0090(13) 0.0013(12) -0.0101(12) 
C17 0.0190(12) 0.0316(14) 0.0394(15) 0.0052(12) -0.0058(11) -0.0059(11) 
C18 0.0222(12) 0.0186(12) 0.0331(13) 0.0011(10) -0.0103(10) -0.0064(10) 
C19 0.0243(12) 0.0241(13) 0.0281(13) -0.0011(10) -0.0032(10) -0.0055(10) 
C20 0.0285(14) 0.0400(15) 0.0339(15) -0.0034(12) -0.0040(11) -0.0108(12) 
C21 0.0347(15) 0.0408(16) 0.0346(15) -0.0038(12) 0.0072(12) -0.0125(12) 
C22 0.0395(15) 0.0430(16) 0.0261(14) -0.0049(12) -0.0010(12) -0.0113(13) 
C23 0.0325(14) 0.0454(16) 0.0276(14) -0.0056(12) -0.0032(11) -0.0125(12) 
C24 0.0264(13) 0.0312(14) 0.0272(14) -0.0046(11) 0.0009(10) -0.0059(11) 
C25 0.0248(13) 0.0368(16) 0.0362(15) -0.0019(12) 0.0018(11) -0.0082(12) 
C26 0.0403(17) 0.0378(17) 0.081(2) -0.0054(15) -0.0135(16) -0.0103(14) 
C27 0.0389(17) 0.0417(18) 0.102(3) 0.0111(18) -0.0180(18) -0.0031(15) 
C28 0.0353(17) 0.061(2) 0.084(2) 0.0154(18) -0.0245(16) -0.0092(16) 
C29 0.0443(18) 0.056(2) 0.075(2) 0.0041(17) -0.0254(16) -0.0228(16) 
C30 0.0364(15) 0.0381(16) 0.0563(18) 0.0010(13) -0.0137(13) -0.0097(13) 
C31 0.0332(15) 0.0449(16) 0.0316(15) 0.0107(13) -0.0046(12) -0.0111(13) 
C32 0.054(2) 0.059(2) 0.086(3) 0.0279(19) 0.0213(19) -0.0020(17) 
C33 0.074(3) 0.059(3) 0.123(3) 0.046(2) 0.017(3) -0.012(2) 
C34 0.076(3) 0.043(2) 0.088(3) 0.0228(19) -0.026(2) -0.0118(19) 
C35 0.061(2) 0.0432(19) 0.0494(18) 0.0045(15) -0.0166(16) -0.0021(16) 
C36 0.0471(17) 0.0463(18) 0.0372(16) 0.0037(13) -0.0070(14) -0.0124(14) 
C37 0.0278(13) 0.0295(13) 0.0180(12) 0.0053(10) -0.0044(10) -0.0100(11) 
C38 0.0329(14) 0.0403(16) 0.0326(14) 0.0104(12) -0.0091(11) -0.0149(12) 
C39 0.0423(16) 0.0503(18) 0.0418(16) 0.0153(14) -0.0166(13) -0.0284(15) 
C40 0.0623(19) 0.0374(16) 0.0411(16) 0.0083(13) -0.0151(14) -0.0316(15) 
C41 0.0487(17) 0.0291(15) 0.0342(15) 0.0041(11) -0.0105(13) -0.0137(13) 
C42 0.0329(13) 0.0271(13) 0.0174(12) 0.0038(10) -0.0045(10) -0.0114(11) 
C43 0.0282(13) 0.0204(12) 0.0243(13) 0.0008(10) -0.0058(10) -0.0051(10) 
C44 0.0292(13) 0.0322(14) 0.0299(14) 0.0029(11) -0.0042(11) -0.0009(11) 
C45 0.0408(16) 0.0435(16) 0.0263(14) 0.0055(12) 0.0001(12) -0.0077(13) 
C46 0.0437(16) 0.0436(17) 0.0319(16) 0.0128(12) -0.0125(13) -0.0051(13) 
C47 0.0404(16) 0.0472(18) 0.0381(17) 0.0071(13) -0.0068(14) 0.0116(14) 
C48 0.0375(15) 0.0361(15) 0.0297(14) 0.0031(12) -0.0023(12) 0.0056(12) 
C49 0.0297(13) 0.0205(12) 0.0216(12) 0.0016(10) -0.0047(10) -0.0013(10) 
C50 0.0397(16) 0.0429(16) 0.0316(15) -0.0065(12) -0.0051(12) -0.0095(13) 
C51 0.0562(19) 0.0514(19) 0.0336(16) -0.0188(14) 0.0005(14) -0.0073(16) 
C52 0.0411(16) 0.0421(17) 0.0279(15) 0.0040(13) 0.0062(12) 0.0038(13) 
C53 0.0334(15) 0.0394(16) 0.0433(17) 0.0036(13) 0.0035(13) -0.0047(13) 
C54 0.0390(15) 0.0307(15) 0.0364(15) -0.0050(12) 0.0008(12) -0.0077(12) 
C55 0.0325(14) 0.0219(13) 0.0335(15) -0.0002(11) 0.0005(11) 0.0016(11) 
C56 0.0499(17) 0.0380(16) 0.0384(17) -0.0009(13) -0.0009(14) -0.0127(13) 
C57 0.062(2) 0.0524(19) 0.0320(17) -0.0050(14) -0.0012(15) -0.0106(16) 
C58 0.0480(18) 0.0517(19) 0.0347(17) 0.0054(14) 0.0074(13) -0.0094(15) 
C59 0.0402(16) 0.0382(16) 0.0459(18) 0.0025(13) 0.0053(14) -0.0111(13) 
C60 0.0381(15) 0.0312(15) 0.0383(16) -0.0013(12) -0.0013(13) -0.0056(12) 
C61 0.0327(14) 0.0299(14) 0.0273(14) 0.0051(11) -0.0031(11) -0.0075(12) 
C62 0.0435(16) 0.0301(15) 0.0481(17) 0.0035(13) -0.0106(13) -0.0038(13) 
C63 0.0509(18) 0.0462(18) 0.0481(18) 0.0118(14) -0.0246(14) -0.0154(15) 
C64 0.0485(17) 0.0517(19) 0.0307(15) -0.0048(13) -0.0035(13) -0.0167(15) 
C65 0.0391(16) 0.0491(18) 0.0436(17) -0.0131(14) 0.0037(13) -0.0073(14) 
C66 0.0315(14) 0.0395(16) 0.0396(16) -0.0041(13) -0.0014(12) -0.0036(13) 
C67 0.0363(14) 0.0275(14) 0.0240(13) -0.0031(11) -0.0023(11) -0.0018(12) 
C68 0.0466(17) 0.0287(15) 0.0393(16) -0.0004(12) -0.0109(13) -0.0064(13) 
C69 0.0500(18) 0.0335(16) 0.0460(17) -0.0055(13) -0.0190(14) 0.0068(14) 
C70 0.0338(15) 0.0450(17) 0.0370(16) -0.0067(13) -0.0088(12) 0.0049(13) 
C71 0.0357(15) 0.0405(16) 0.0298(14) -0.0011(12) -0.0030(12) -0.0046(12) 
C72 0.0299(14) 0.0361(15) 0.0237(13) -0.0041(11) -0.0004(11) -0.0021(12) 
C73 0.0319(14) 0.0258(13) 0.0325(14) 0.0047(11) -0.0007(11) -0.0064(11) 
C74 0.0321(14) 0.0318(14) 0.0366(15) -0.0030(12) 0.0011(12) -0.0076(12) 
C75 0.0379(15) 0.0468(17) 0.0404(17) -0.0089(13) -0.0009(13) -0.0087(13) 
C76 0.0543(19) 0.0465(18) 0.0339(16) -0.0058(13) 0.0011(14) -0.0142(15) 
C77 0.0551(19) 0.0412(17) 0.0413(17) 0.0037(13) -0.0175(14) -0.0128(14) 
C78 0.0407(16) 0.0338(15) 0.0448(17) 0.0012(13) -0.0064(13) -0.0068(13) 
C79 0.0358(15) 0.0494(17) 0.0280(14) -0.0004(12) 0.0017(12) -0.0085(13) 
C80 0.0379(16) 0.059(2) 0.0485(18) 0.0082(15) 0.0029(14) -0.0160(15) 
C81 0.058(2) 0.064(2) 0.058(2) 0.0155(17) -0.0011(17) -0.0304(18) 
C82 0.067(2) 0.058(2) 0.065(2) 0.0262(17) -0.0045(18) -0.0169(19) 
C83 0.061(2) 0.068(2) 0.0493(19) 0.0234(17) -0.0112(16) -0.0136(18) 
C84 0.0577(19) 0.059(2) 0.0329(16) 0.0056(14) -0.0081(14) -0.0167(16) 
C85 0.0321(15) 0.0423(17) 0.0370(15) -0.0031(13) -0.0079(12) -0.0052(13) 
C86 0.0345(15) 0.0409(16) 0.0427(16) -0.0029(13) -0.0008(13) -0.0037(13) 
C87 0.0321(16) 0.062(2) 0.0520(19) 0.0031(16) -0.0099(14) -0.0074(15) 
C88 0.0450(19) 0.079(3) 0.060(2) 0.0149(18) -0.0178(16) -0.0307(19) 
C89 0.059(2) 0.047(2) 0.079(2) 0.0099(17) -0.0211(18) -0.0218(18) 
C90 0.0442(18) 0.0415(18) 0.071(2) 0.0012(15) -0.0173(16) -0.0009(15) 
C91 0.0221(13) 0.0269(14) 0.0387(15) -0.0005(11) 0.0012(11) 0.0046(11) 
C92 0.0277(14) 0.0393(16) 0.0486(17) 0.0018(13) -0.0033(12) -0.0024(12) 
C93 0.0353(15) 0.0486(18) 0.0406(17) -0.0025(14) -0.0075(13) 0.0014(14) 
C94 0.0393(16) 0.0526(18) 0.0360(16) 0.0088(13) -0.0056(13) -0.0030(14) 
C95 0.0380(16) 0.0468(17) 0.0417(17) 0.0130(13) 0.0005(13) -0.0067(13) 
C96 0.0257(13) 0.0305(14) 0.0348(15) -0.0002(11) 0.0012(11) 0.0001(11) 
C97 0.0295(13) 0.0242(13) 0.0282(13) 0.0054(11) -0.0028(11) -0.0048(11) 
C98 0.0293(14) 0.0393(16) 0.0383(15) -0.0053(12) -0.0061(12) -0.0054(12) 
C99 0.0377(16) 0.0411(16) 0.0379(16) -0.0088(12) -0.0053(13) 0.0008(13) 
C100 0.0297(14) 0.0399(16) 0.0411(16) 0.0023(13) 0.0002(12) 0.0043(12) 
C101 0.0303(15) 0.0382(16) 0.0518(17) -0.0002(14) -0.0116(13) -0.0056(12) 
C102 0.0335(15) 0.0325(15) 0.0427(16) -0.0057(12) -0.0049(12) -0.0057(12) 
C103 0.0309(14) 0.0311(14) 0.0354(15) -0.0026(12) -0.0019(12) 0.0014(12) 
C104 0.0569(18) 0.0318(16) 0.0371(16) -0.0035(13) -0.0060(14) -0.0068(14) 
C105 0.0599(19) 0.0303(16) 0.057(2) 0.0038(14) -0.0173(16) -0.0062(14) 
C106 0.0506(19) 0.0301(16) 0.072(2) -0.0083(16) -0.0182(17) 0.0010(14) 
C107 0.056(2) 0.054(2) 0.058(2) -0.0264(17) -0.0056(17) 0.0034(17) 
C108 0.0384(16) 0.0450(18) 0.0439(17) -0.0073(14) -0.0020(13) -0.0004(13) 
 
_geom_special_details 
; 
 All esds (except the esd in the dihedral angle between two l.s. planes) 
 are estimated using the full covariance matrix.  The cell esds are taken 
 into account individually in the estimation of esds in distances, angles 
 and torsion angles; correlations between esds in cell parameters are only 
 used when they are defined by crystal symmetry.  An approximate (isotropic) 
 treatment of cell esds is used for estimating esds involving l.s. planes. 
; 
 
loop_ 
 _geom_bond_atom_site_label_1 
 _geom_bond_atom_site_label_2 
 _geom_bond_distance 
 _geom_bond_site_symmetry_2 
 _geom_bond_publ_flag 
P1 C13 1.815(2) . ? 
P1 C1 1.820(2) . ? 
P1 C7 1.835(2) . ? 
P1 Al1 2.8197(9) . ? 
P2 C31 1.831(3) . ? 
P2 C24 1.834(2) . ? 
P2 C25 1.837(2) . ? 
P3 C49 1.815(2) . ? 
P3 C42 1.817(2) . ? 
P3 C43 1.830(2) . ? 
P3 Al1 2.6305(9) . ? 
P4 C67 1.815(2) . ? 
P4 C61 1.821(2) . ? 
P4 C55 1.825(3) . ? 
P4 Al2 2.7265(10) . ? 
P5 C79 1.825(3) . ? 
P5 C85 1.825(3) . ? 
P5 C74 1.835(3) . ? 
P6 C96 1.816(2) . ? 
P6 C103 1.819(3) . ? 
P6 C97 1.825(2) . ? 
P6 Al2 2.6639(10) . ? 
Al1 C19 1.976(2) . ? 
Al1 C18 1.992(2) . ? 
Al1 C37 2.005(2) . ? 
Al2 C91 1.983(3) . ? 
Al2 C73 1.990(3) . ? 
Al2 C72 2.001(2) . ? 
C1 C6 1.388(3) . ? 
C1 C2 1.398(3) . ? 
C2 C3 1.376(3) . ? 
C2 H2 0.9500 . ? 
C3 C4 1.386(4) . ? 
C3 H3 0.9500 . ? 
C4 C5 1.378(3) . ? 
C4 H4 0.9500 . ? 
C5 C6 1.386(3) . ? 
C5 H5 0.9500 . ? 
C6 H6 0.9500 . ? 
C7 C12 1.385(3) . ? 
C7 C8 1.395(3) . ? 
C8 C9 1.378(3) . ? 
C8 H8 0.9500 . ? 
C9 C10 1.372(4) . ? 
C9 H9 0.9500 . ? 
C10 C11 1.375(4) . ? 
C10 H10 0.9500 . ? 
C11 C12 1.396(3) . ? 
C11 H11 0.9500 . ? 
C12 H12 0.9500 . ? 
C13 C14 1.400(3) . ? 
C13 C18 1.405(3) . ? 
C14 C15 1.367(3) . ? 
C14 H14 0.9500 . ? 
C15 C16 1.391(3) . ? 
C15 H15 0.9500 . ? 
C16 C17 1.379(3) . ? 
C16 H16 0.9500 . ? 
C17 C18 1.397(3) . ? 
C17 H17 0.9500 . ? 
C19 C20 1.407(3) . ? 
C19 C24 1.407(3) . ? 
C20 C21 1.378(3) . ? 
C20 H20 0.9500 . ? 
C21 C22 1.379(3) . ? 
C21 H21 0.9500 . ? 
C22 C23 1.387(3) . ? 
C22 H22 0.9500 . ? 
C23 C24 1.389(3) . ? 
C23 H23 0.9500 . ? 
C25 C30 1.382(3) . ? 
C25 C26 1.394(4) . ? 
C26 C27 1.372(4) . ? 
C26 H26 0.9500 . ? 
C27 C28 1.364(4) . ? 
C27 H27 0.9500 . ? 
C28 C29 1.371(4) . ? 
C28 H28 0.9500 . ? 
C29 C30 1.396(3) . ? 
C29 H29 0.9500 . ? 
C30 H30 0.9500 . ? 
C31 C32 1.380(4) . ? 
C31 C36 1.403(4) . ? 
C32 C33 1.397(5) . ? 
C32 H32 0.9500 . ? 
C33 C34 1.355(5) . ? 
C33 H33 0.9500 . ? 
C34 C35 1.375(4) . ? 
C34 H34 0.9500 . ? 
C35 C36 1.380(4) . ? 
C35 H35 0.9500 . ? 
C36 H36 0.9500 . ? 
C37 C38 1.402(3) . ? 
C37 C42 1.417(3) . ? 
C38 C39 1.381(3) . ? 
C38 H38 0.9500 . ? 
C39 C40 1.381(4) . ? 
C39 H39 0.9500 . ? 
C40 C41 1.387(4) . ? 
C40 H40 0.9500 . ? 
C41 C42 1.391(3) . ? 
C41 H41 0.9500 . ? 
C43 C48 1.383(3) . ? 
C43 C44 1.386(3) . ? 
C44 C45 1.379(3) . ? 
C44 H44 0.9500 . ? 
C45 C46 1.370(3) . ? 
C45 H45 0.9500 . ? 
C46 C47 1.363(4) . ? 
C46 H46 0.9500 . ? 
C47 C48 1.394(3) . ? 
C47 H47 0.9500 . ? 
C48 H48 0.9500 . ? 
C49 C50 1.379(3) . ? 
C49 C54 1.389(3) . ? 
C50 C51 1.394(4) . ? 
C50 H50 0.9500 . ? 
C51 C52 1.360(4) . ? 
C51 H51 0.9500 . ? 
C52 C53 1.379(4) . ? 
C52 H52 0.9500 . ? 
C53 C54 1.381(3) . ? 
C53 H53 0.9500 . ? 
C54 H54 0.9500 . ? 
C55 C60 1.379(3) . ? 
C55 C56 1.402(3) . ? 
C56 C57 1.388(4) . ? 
C56 H56 0.9500 . ? 
C57 C58 1.371(4) . ? 
C57 H57 0.9500 . ? 
C58 C59 1.372(4) . ? 
C58 H58 0.9500 . ? 
C59 C60 1.386(4) . ? 
C59 H59 0.9500 . ? 
C60 H60 0.9500 . ? 
C61 C62 1.388(3) . ? 
C61 C66 1.389(3) . ? 
C62 C63 1.392(4) . ? 
C62 H62 0.9500 . ? 
C63 C64 1.366(4) . ? 
C63 H63 0.9500 . ? 
C64 C65 1.372(4) . ? 
C64 H64 0.9500 . ? 
C65 C66 1.390(4) . ? 
C65 H65 0.9500 . ? 
C66 H66 0.9500 . ? 
C67 C68 1.400(3) . ? 
C67 C72 1.411(3) . ? 
C68 C69 1.378(4) . ? 
C68 H68 0.9500 . ? 
C69 C70 1.383(4) . ? 
C69 H69 0.9500 . ? 
C70 C71 1.387(3) . ? 
C70 H70 0.9500 . ? 
C71 C72 1.401(3) . ? 
C71 H71 0.9500 . ? 
C73 C78 1.387(3) . ? 
C73 C74 1.406(3) . ? 
C74 C75 1.398(3) . ? 
C75 C76 1.377(4) . ? 
C75 H75 0.9500 . ? 
C76 C77 1.381(4) . ? 
C76 H76 0.9500 . ? 
C77 C78 1.387(4) . ? 
C77 H77 0.9500 . ? 
C78 H78 0.9500 . ? 
C79 C80 1.396(4) . ? 
C79 C84 1.407(4) . ? 
C80 C81 1.389(4) . ? 
C80 H80 0.9500 . ? 
C81 C82 1.373(4) . ? 
C81 H81 0.9500 . ? 
C82 C83 1.375(4) . ? 
C82 H82 0.9500 . ? 
C83 C84 1.390(4) . ? 
C83 H83 0.9500 . ? 
C84 H84 0.9500 . ? 
C85 C86 1.388(3) . ? 
C85 C90 1.405(4) . ? 
C86 C87 1.380(4) . ? 
C86 H86 0.9500 . ? 
C87 C88 1.366(4) . ? 
C87 H87 0.9500 . ? 
C88 C89 1.382(4) . ? 
C88 H88 0.9500 . ? 
C89 C90 1.379(4) . ? 
C89 H89 0.9500 . ? 
C90 H90 0.9500 . ? 
C91 C96 1.405(3) . ? 
C91 C92 1.408(3) . ? 
C92 C93 1.378(3) . ? 
C92 H92 0.9500 . ? 
C93 C94 1.392(4) . ? 
C93 H93 0.9500 . ? 
C94 C95 1.378(4) . ? 
C94 H94 0.9500 . ? 
C95 C96 1.388(3) . ? 
C95 H95 0.9500 . ? 
C97 C98 1.388(3) . ? 
C97 C102 1.387(3) . ? 
C98 C99 1.378(3) . ? 
C98 H98 0.9500 . ? 
C99 C100 1.390(4) . ? 
C99 H99 0.9500 . ? 
C100 C101 1.384(4) . ? 
C100 H100 0.9500 . ? 
C101 C102 1.376(3) . ? 
C101 H101 0.9500 . ? 
C102 H102 0.9500 . ? 
C103 C108 1.380(3) . ? 
C103 C104 1.388(4) . ? 
C104 C105 1.386(4) . ? 
C104 H104 0.9500 . ? 
C105 C106 1.383(4) . ? 
C105 H105 0.9500 . ? 
C106 C107 1.367(4) . ? 
C106 H106 0.9500 . ? 
C107 C108 1.395(4) . ? 
C107 H107 0.9500 . ? 
C108 H108 0.9500 . ? 
 
loop_ 
 _geom_angle_atom_site_label_1 
 _geom_angle_atom_site_label_2 
 _geom_angle_atom_site_label_3 
 _geom_angle 
 _geom_angle_site_symmetry_1 
 _geom_angle_site_symmetry_3 
 _geom_angle_publ_flag 
C13 P1 C1 106.76(10) . . ? 
C13 P1 C7 103.99(10) . . ? 
C1 P1 C7 104.55(10) . . ? 
C13 P1 Al1 71.73(7) . . ? 
C1 P1 Al1 120.30(7) . . ? 
C7 P1 Al1 134.48(8) . . ? 
C31 P2 C24 101.40(11) . . ? 
C31 P2 C25 102.72(11) . . ? 
C24 P2 C25 101.63(11) . . ? 
C49 P3 C42 112.34(10) . . ? 
C49 P3 C43 103.41(10) . . ? 
C42 P3 C43 105.02(10) . . ? 
C49 P3 Al1 130.35(7) . . ? 
C42 P3 Al1 75.56(8) . . ? 
C43 P3 Al1 122.35(8) . . ? 
C67 P4 C61 107.46(11) . . ? 
C67 P4 C55 106.53(11) . . ? 
C61 P4 C55 104.05(11) . . ? 
C67 P4 Al2 73.73(8) . . ? 
C61 P4 Al2 123.81(8) . . ? 
C55 P4 Al2 130.19(8) . . ? 
C79 P5 C85 104.36(12) . . ? 
C79 P5 C74 101.12(12) . . ? 
C85 P5 C74 102.17(11) . . ? 
C96 P6 C103 110.99(11) . . ? 
C96 P6 C97 105.05(11) . . ? 
C103 P6 C97 102.12(11) . . ? 
C96 P6 Al2 74.56(8) . . ? 
C103 P6 Al2 133.43(9) . . ? 
C97 P6 Al2 121.58(8) . . ? 
C19 Al1 C18 128.11(10) . . ? 
C19 Al1 C37 113.71(9) . . ? 
C18 Al1 C37 117.52(9) . . ? 
C19 Al1 P3 102.05(7) . . ? 
C18 Al1 P3 104.27(7) . . ? 
C37 Al1 P3 67.52(7) . . ? 
C19 Al1 P1 101.61(7) . . ? 
C18 Al1 P1 64.82(6) . . ? 
C37 Al1 P1 97.20(7) . . ? 
P3 Al1 P1 155.56(3) . . ? 
C91 Al2 C73 126.58(10) . . ? 
C91 Al2 C72 121.84(10) . . ? 
C73 Al2 C72 111.55(10) . . ? 
C91 Al2 P6 66.85(8) . . ? 
C73 Al2 P6 102.96(8) . . ? 
C72 Al2 P6 100.91(8) . . ? 
C91 Al2 P4 107.77(8) . . ? 
C73 Al2 P4 94.50(7) . . ? 
C72 Al2 P4 65.91(8) . . ? 
P6 Al2 P4 161.31(4) . . ? 
C6 C1 C2 118.2(2) . . ? 
C6 C1 P1 123.56(17) . . ? 
C2 C1 P1 118.01(17) . . ? 
C3 C2 C1 121.0(2) . . ? 
C3 C2 H2 119.5 . . ? 
C1 C2 H2 119.5 . . ? 
C2 C3 C4 120.0(2) . . ? 
C2 C3 H3 120.0 . . ? 
C4 C3 H3 120.0 . . ? 
C5 C4 C3 119.8(2) . . ? 
C5 C4 H4 120.1 . . ? 
C3 C4 H4 120.1 . . ? 
C4 C5 C6 120.2(2) . . ? 
C4 C5 H5 119.9 . . ? 
C6 C5 H5 119.9 . . ? 
C5 C6 C1 120.7(2) . . ? 
C5 C6 H6 119.6 . . ? 
C1 C6 H6 119.6 . . ? 
C12 C7 C8 118.7(2) . . ? 
C12 C7 P1 125.15(18) . . ? 
C8 C7 P1 116.19(18) . . ? 
C9 C8 C7 120.6(2) . . ? 
C9 C8 H8 119.7 . . ? 
C7 C8 H8 119.7 . . ? 
C10 C9 C8 120.5(2) . . ? 
C10 C9 H9 119.7 . . ? 
C8 C9 H9 119.7 . . ? 
C9 C10 C11 119.7(2) . . ? 
C9 C10 H10 120.1 . . ? 
C11 C10 H10 120.1 . . ? 
C10 C11 C12 120.4(2) . . ? 
C10 C11 H11 119.8 . . ? 
C12 C11 H11 119.8 . . ? 
C7 C12 C11 120.1(2) . . ? 
C7 C12 H12 120.0 . . ? 
C11 C12 H12 120.0 . . ? 
C14 C13 C18 121.7(2) . . ? 
C14 C13 P1 126.79(17) . . ? 
C18 C13 P1 111.50(16) . . ? 
C15 C14 C13 119.6(2) . . ? 
C15 C14 H14 120.2 . . ? 
C13 C14 H14 120.2 . . ? 
C14 C15 C16 120.1(2) . . ? 
C14 C15 H15 119.9 . . ? 
C16 C15 H15 119.9 . . ? 
C17 C16 C15 120.1(2) . . ? 
C17 C16 H16 120.0 . . ? 
C15 C16 H16 120.0 . . ? 
C16 C17 C18 121.9(2) . . ? 
C16 C17 H17 119.1 . . ? 
C18 C17 H17 119.1 . . ? 
C17 C18 C13 116.6(2) . . ? 
C17 C18 Al1 131.42(16) . . ? 
C13 C18 Al1 111.95(16) . . ? 
C20 C19 C24 116.3(2) . . ? 
C20 C19 Al1 117.07(16) . . ? 
C24 C19 Al1 125.82(17) . . ? 
C21 C20 C19 121.9(2) . . ? 
C21 C20 H20 119.0 . . ? 
C19 C20 H20 119.0 . . ? 
C22 C21 C20 120.6(2) . . ? 
C22 C21 H21 119.7 . . ? 
C20 C21 H21 119.7 . . ? 
C21 C22 C23 119.2(2) . . ? 
C21 C22 H22 120.4 . . ? 
C23 C22 H22 120.4 . . ? 
C22 C23 C24 120.3(2) . . ? 
C22 C23 H23 119.8 . . ? 
C24 C23 H23 119.8 . . ? 
C23 C24 C19 121.5(2) . . ? 
C23 C24 P2 122.38(18) . . ? 
C19 C24 P2 116.09(17) . . ? 
C30 C25 C26 117.7(2) . . ? 
C30 C25 P2 125.9(2) . . ? 
C26 C25 P2 116.38(19) . . ? 
C27 C26 C25 121.5(3) . . ? 
C27 C26 H26 119.2 . . ? 
C25 C26 H26 119.2 . . ? 
C28 C27 C26 120.0(3) . . ? 
C28 C27 H27 120.0 . . ? 
C26 C27 H27 120.0 . . ? 
C27 C28 C29 120.4(3) . . ? 
C27 C28 H28 119.8 . . ? 
C29 C28 H28 119.8 . . ? 
C28 C29 C30 119.7(3) . . ? 
C28 C29 H29 120.1 . . ? 
C30 C29 H29 120.1 . . ? 
C25 C30 C29 120.7(3) . . ? 
C25 C30 H30 119.7 . . ? 
C29 C30 H30 119.7 . . ? 
C32 C31 C36 116.5(3) . . ? 
C32 C31 P2 119.3(2) . . ? 
C36 C31 P2 124.1(2) . . ? 
C31 C32 C33 121.5(3) . . ? 
C31 C32 H32 119.2 . . ? 
C33 C32 H32 119.2 . . ? 
C34 C33 C32 120.3(3) . . ? 
C34 C33 H33 119.8 . . ? 
C32 C33 H33 119.8 . . ? 
C33 C34 C35 119.9(3) . . ? 
C33 C34 H34 120.0 . . ? 
C35 C34 H34 120.0 . . ? 
C34 C35 C36 119.8(3) . . ? 
C34 C35 H35 120.1 . . ? 
C36 C35 H35 120.1 . . ? 
C35 C36 C31 121.8(3) . . ? 
C35 C36 H36 119.1 . . ? 
C31 C36 H36 119.1 . . ? 
C38 C37 C42 116.1(2) . . ? 
C38 C37 Al1 135.32(19) . . ? 
C42 C37 Al1 108.57(15) . . ? 
C39 C38 C37 121.5(2) . . ? 
C39 C38 H38 119.3 . . ? 
C37 C38 H38 119.3 . . ? 
C40 C39 C38 121.1(2) . . ? 
C40 C39 H39 119.4 . . ? 
C38 C39 H39 119.4 . . ? 
C39 C40 C41 119.7(2) . . ? 
C39 C40 H40 120.2 . . ? 
C41 C40 H40 120.2 . . ? 
C40 C41 C42 119.1(2) . . ? 
C40 C41 H41 120.5 . . ? 
C42 C41 H41 120.5 . . ? 
C41 C42 C37 122.5(2) . . ? 
C41 C42 P3 129.23(19) . . ? 
C37 C42 P3 108.07(16) . . ? 
C48 C43 C44 118.4(2) . . ? 
C48 C43 P3 124.00(18) . . ? 
C44 C43 P3 117.48(17) . . ? 
C45 C44 C43 120.7(2) . . ? 
C45 C44 H44 119.6 . . ? 
C43 C44 H44 119.6 . . ? 
C46 C45 C44 120.3(2) . . ? 
C46 C45 H45 119.8 . . ? 
C44 C45 H45 119.8 . . ? 
C47 C46 C45 119.9(2) . . ? 
C47 C46 H46 120.0 . . ? 
C45 C46 H46 120.0 . . ? 
C46 C47 C48 120.3(2) . . ? 
C46 C47 H47 119.9 . . ? 
C48 C47 H47 119.9 . . ? 
C43 C48 C47 120.3(2) . . ? 
C43 C48 H48 119.9 . . ? 
C47 C48 H48 119.9 . . ? 
C50 C49 C54 118.2(2) . . ? 
C50 C49 P3 124.95(19) . . ? 
C54 C49 P3 116.86(17) . . ? 
C49 C50 C51 120.2(2) . . ? 
C49 C50 H50 119.9 . . ? 
C51 C50 H50 119.9 . . ? 
C52 C51 C50 120.6(2) . . ? 
C52 C51 H51 119.7 . . ? 
C50 C51 H51 119.7 . . ? 
C51 C52 C53 120.1(2) . . ? 
C51 C52 H52 119.9 . . ? 
C53 C52 H52 119.9 . . ? 
C52 C53 C54 119.3(3) . . ? 
C52 C53 H53 120.4 . . ? 
C54 C53 H53 120.4 . . ? 
C53 C54 C49 121.5(2) . . ? 
C53 C54 H54 119.2 . . ? 
C49 C54 H54 119.2 . . ? 
C60 C55 C56 118.2(2) . . ? 
C60 C55 P4 124.47(19) . . ? 
C56 C55 P4 117.19(19) . . ? 
C57 C56 C55 120.3(3) . . ? 
C57 C56 H56 119.8 . . ? 
C55 C56 H56 119.8 . . ? 
C58 C57 C56 120.4(3) . . ? 
C58 C57 H57 119.8 . . ? 
C56 C57 H57 119.8 . . ? 
C57 C58 C59 119.7(3) . . ? 
C57 C58 H58 120.2 . . ? 
C59 C58 H58 120.2 . . ? 
C58 C59 C60 120.5(3) . . ? 
C58 C59 H59 119.8 . . ? 
C60 C59 H59 119.8 . . ? 
C55 C60 C59 120.9(2) . . ? 
C55 C60 H60 119.6 . . ? 
C59 C60 H60 119.6 . . ? 
C62 C61 C66 118.0(2) . . ? 
C62 C61 P4 118.19(19) . . ? 
C66 C61 P4 123.80(18) . . ? 
C61 C62 C63 120.9(2) . . ? 
C61 C62 H62 119.6 . . ? 
C63 C62 H62 119.6 . . ? 
C64 C63 C62 120.3(2) . . ? 
C64 C63 H63 119.8 . . ? 
C62 C63 H63 119.8 . . ? 
C63 C64 C65 119.8(3) . . ? 
C63 C64 H64 120.1 . . ? 
C65 C64 H64 120.1 . . ? 
C64 C65 C66 120.3(3) . . ? 
C64 C65 H65 119.8 . . ? 
C66 C65 H65 119.8 . . ? 
C61 C66 C65 120.7(2) . . ? 
C61 C66 H66 119.6 . . ? 
C65 C66 H66 119.6 . . ? 
C68 C67 C72 122.3(2) . . ? 
C68 C67 P4 128.2(2) . . ? 
C72 C67 P4 109.41(17) . . ? 
C69 C68 C67 118.8(3) . . ? 
C69 C68 H68 120.6 . . ? 
C67 C68 H68 120.6 . . ? 
C68 C69 C70 120.4(2) . . ? 
C68 C69 H69 119.8 . . ? 
C70 C69 H69 119.8 . . ? 
C69 C70 C71 120.4(2) . . ? 
C69 C70 H70 119.8 . . ? 
C71 C70 H70 119.8 . . ? 
C70 C71 C72 121.6(3) . . ? 
C70 C71 H71 119.2 . . ? 
C72 C71 H71 119.2 . . ? 
C71 C72 C67 116.3(2) . . ? 
C71 C72 Al2 133.2(2) . . ? 
C67 C72 Al2 110.31(17) . . ? 
C78 C73 C74 116.9(2) . . ? 
C78 C73 Al2 116.97(18) . . ? 
C74 C73 Al2 125.87(18) . . ? 
C75 C74 C73 120.5(2) . . ? 
C75 C74 P5 121.68(19) . . ? 
C73 C74 P5 117.75(18) . . ? 
C76 C75 C74 120.8(3) . . ? 
C76 C75 H75 119.6 . . ? 
C74 C75 H75 119.6 . . ? 
C75 C76 C77 119.6(3) . . ? 
C75 C76 H76 120.2 . . ? 
C77 C76 H76 120.2 . . ? 
C76 C77 C78 119.5(2) . . ? 
C76 C77 H77 120.3 . . ? 
C78 C77 H77 120.3 . . ? 
C77 C78 C73 122.7(3) . . ? 
C77 C78 H78 118.6 . . ? 
C73 C78 H78 118.6 . . ? 
C80 C79 C84 117.4(3) . . ? 
C80 C79 P5 121.9(2) . . ? 
C84 C79 P5 120.5(2) . . ? 
C81 C80 C79 121.2(3) . . ? 
C81 C80 H80 119.4 . . ? 
C79 C80 H80 119.4 . . ? 
C82 C81 C80 120.5(3) . . ? 
C82 C81 H81 119.7 . . ? 
C80 C81 H81 119.7 . . ? 
C83 C82 C81 119.5(3) . . ? 
C83 C82 H82 120.2 . . ? 
C81 C82 H82 120.2 . . ? 
C82 C83 C84 120.8(3) . . ? 
C82 C83 H83 119.6 . . ? 
C84 C83 H83 119.6 . . ? 
C83 C84 C79 120.5(3) . . ? 
C83 C84 H84 119.7 . . ? 
C79 C84 H84 119.7 . . ? 
C86 C85 C90 117.3(3) . . ? 
C86 C85 P5 128.0(2) . . ? 
C90 C85 P5 114.7(2) . . ? 
C87 C86 C85 120.7(3) . . ? 
C87 C86 H86 119.7 . . ? 
C85 C86 H86 119.7 . . ? 
C88 C87 C86 120.9(3) . . ? 
C88 C87 H87 119.5 . . ? 
C86 C87 H87 119.5 . . ? 
C87 C88 C89 120.1(3) . . ? 
C87 C88 H88 119.9 . . ? 
C89 C88 H88 119.9 . . ? 
C90 C89 C88 119.1(3) . . ? 
C90 C89 H89 120.5 . . ? 
C88 C89 H89 120.5 . . ? 
C89 C90 C85 121.8(3) . . ? 
C89 C90 H90 119.1 . . ? 
C85 C90 H90 119.1 . . ? 
C96 C91 C92 116.3(2) . . ? 
C96 C91 Al2 110.02(17) . . ? 
C92 C91 Al2 133.7(2) . . ? 
C93 C92 C91 121.7(3) . . ? 
C93 C92 H92 119.2 . . ? 
C91 C92 H92 119.2 . . ? 
C92 C93 C94 120.3(3) . . ? 
C92 C93 H93 119.8 . . ? 
C94 C93 H93 119.8 . . ? 
C95 C94 C93 119.8(2) . . ? 
C95 C94 H94 120.1 . . ? 
C93 C94 H94 120.1 . . ? 
C94 C95 C96 119.6(3) . . ? 
C94 C95 H95 120.2 . . ? 
C96 C95 H95 120.2 . . ? 
C95 C96 C91 122.3(2) . . ? 
C95 C96 P6 129.3(2) . . ? 
C91 C96 P6 108.30(17) . . ? 
C98 C97 C102 118.3(2) . . ? 
C98 C97 P6 121.15(18) . . ? 
C102 C97 P6 120.23(19) . . ? 
C99 C98 C97 121.0(2) . . ? 
C99 C98 H98 119.5 . . ? 
C97 C98 H98 119.5 . . ? 
C98 C99 C100 120.0(2) . . ? 
C98 C99 H99 120.0 . . ? 
C100 C99 H99 120.0 . . ? 
C101 C100 C99 119.4(2) . . ? 
C101 C100 H100 120.3 . . ? 
C99 C100 H100 120.3 . . ? 
C102 C101 C100 120.1(2) . . ? 
C102 C101 H101 120.0 . . ? 
C100 C101 H101 120.0 . . ? 
C101 C102 C97 121.2(2) . . ? 
C101 C102 H102 119.4 . . ? 
C97 C102 H102 119.4 . . ? 
C108 C103 C104 118.7(2) . . ? 
C108 C103 P6 118.7(2) . . ? 
C104 C103 P6 122.52(19) . . ? 
C105 C104 C103 121.6(3) . . ? 
C105 C104 H104 119.2 . . ? 
C103 C104 H104 119.2 . . ? 
C104 C105 C106 118.9(3) . . ? 
C104 C105 H105 120.6 . . ? 
C106 C105 H105 120.6 . . ? 
C107 C106 C105 120.3(3) . . ? 
C107 C106 H106 119.9 . . ? 
C105 C106 H106 119.9 . . ? 
C106 C107 C108 120.7(3) . . ? 
C106 C107 H107 119.7 . . ? 
C108 C107 H107 119.7 . . ? 
C103 C108 C107 119.9(3) . . ? 
C103 C108 H108 120.1 . . ? 
C107 C108 H108 120.1 . . ? 
 
loop_ 
 _geom_torsion_atom_site_label_1 
 _geom_torsion_atom_site_label_2 
 _geom_torsion_atom_site_label_3 
 _geom_torsion_atom_site_label_4 
 _geom_torsion 
 _geom_torsion_site_symmetry_1 
 _geom_torsion_site_symmetry_2 
 _geom_torsion_site_symmetry_3 
 _geom_torsion_site_symmetry_4 
 _geom_torsion_publ_flag 
C49 P3 Al1 C19 -138.94(12) . . . . ? 
C42 P3 Al1 C19 113.83(10) . . . . ? 
C43 P3 Al1 C19 14.99(11) . . . . ? 
C49 P3 Al1 C18 -4.08(12) . . . . ? 
C42 P3 Al1 C18 -111.31(10) . . . . ? 
C43 P3 Al1 C18 149.85(11) . . . . ? 
C49 P3 Al1 C37 110.17(12) . . . . ? 
C42 P3 Al1 C37 2.94(9) . . . . ? 
C43 P3 Al1 C37 -95.91(11) . . . . ? 
C49 P3 Al1 P1 55.80(13) . . . . ? 
C42 P3 Al1 P1 -51.43(11) . . . . ? 
C43 P3 Al1 P1 -150.27(11) . . . . ? 
C13 P1 Al1 C19 126.93(10) . . . . ? 
C1 P1 Al1 C19 -133.94(11) . . . . ? 
C7 P1 Al1 C19 35.05(13) . . . . ? 
C13 P1 Al1 C18 0.08(10) . . . . ? 
C1 P1 Al1 C18 99.22(11) . . . . ? 
C7 P1 Al1 C18 -91.79(13) . . . . ? 
C13 P1 Al1 C37 -116.99(10) . . . . ? 
C1 P1 Al1 C37 -17.85(11) . . . . ? 
C7 P1 Al1 C37 151.14(12) . . . . ? 
C13 P1 Al1 P3 -67.79(11) . . . . ? 
C1 P1 Al1 P3 31.34(13) . . . . ? 
C7 P1 Al1 P3 -159.66(12) . . . . ? 
C96 P6 Al2 C91 -2.94(11) . . . . ? 
C103 P6 Al2 C91 -107.43(13) . . . . ? 
C97 P6 Al2 C91 95.47(12) . . . . ? 
C96 P6 Al2 C73 121.57(11) . . . . ? 
C103 P6 Al2 C73 17.09(14) . . . . ? 
C97 P6 Al2 C73 -140.01(11) . . . . ? 
C96 P6 Al2 C72 -123.07(10) . . . . ? 
C103 P6 Al2 C72 132.44(13) . . . . ? 
C97 P6 Al2 C72 -24.65(12) . . . . ? 
C96 P6 Al2 P4 -79.75(13) . . . . ? 
C103 P6 Al2 P4 175.76(13) . . . . ? 
C97 P6 Al2 P4 18.67(15) . . . . ? 
C67 P4 Al2 C91 -122.09(10) . . . . ? 
C61 P4 Al2 C91 -21.68(12) . . . . ? 
C55 P4 Al2 C91 139.78(12) . . . . ? 
C67 P4 Al2 C73 107.14(10) . . . . ? 
C61 P4 Al2 C73 -152.45(12) . . . . ? 
C55 P4 Al2 C73 9.02(13) . . . . ? 
C67 P4 Al2 C72 -4.48(10) . . . . ? 
C61 P4 Al2 C72 95.93(12) . . . . ? 
C55 P4 Al2 C72 -102.60(12) . . . . ? 
C67 P4 Al2 P6 -52.03(13) . . . . ? 
C61 P4 Al2 P6 48.38(15) . . . . ? 
C55 P4 Al2 P6 -150.16(13) . . . . ? 
C13 P1 C1 C6 3.8(2) . . . . ? 
C7 P1 C1 C6 113.66(19) . . . . ? 
Al1 P1 C1 C6 -74.4(2) . . . . ? 
C13 P1 C1 C2 178.61(17) . . . . ? 
C7 P1 C1 C2 -71.57(19) . . . . ? 
Al1 P1 C1 C2 100.34(17) . . . . ? 
C6 C1 C2 C3 -1.5(3) . . . . ? 
P1 C1 C2 C3 -176.52(18) . . . . ? 
C1 C2 C3 C4 1.3(4) . . . . ? 
C2 C3 C4 C5 -0.2(4) . . . . ? 
C3 C4 C5 C6 -0.7(4) . . . . ? 
C4 C5 C6 C1 0.5(4) . . . . ? 
C2 C1 C6 C5 0.5(3) . . . . ? 
P1 C1 C6 C5 175.30(18) . . . . ? 
C13 P1 C7 C12 115.1(2) . . . . ? 
C1 P1 C7 C12 3.3(2) . . . . ? 
Al1 P1 C7 C12 -166.92(16) . . . . ? 
C13 P1 C7 C8 -64.5(2) . . . . ? 
C1 P1 C7 C8 -176.34(18) . . . . ? 
Al1 P1 C7 C8 13.5(2) . . . . ? 
C12 C7 C8 C9 0.0(4) . . . . ? 
P1 C7 C8 C9 179.7(2) . . . . ? 
C7 C8 C9 C10 0.1(4) . . . . ? 
C8 C9 C10 C11 -0.3(4) . . . . ? 
C9 C10 C11 C12 0.5(4) . . . . ? 
C8 C7 C12 C11 0.2(4) . . . . ? 
P1 C7 C12 C11 -179.42(19) . . . . ? 
C10 C11 C12 C7 -0.4(4) . . . . ? 
C1 P1 C13 C14 63.6(2) . . . . ? 
C7 P1 C13 C14 -46.6(2) . . . . ? 
Al1 P1 C13 C14 -179.3(2) . . . . ? 
C1 P1 C13 C18 -117.21(16) . . . . ? 
C7 P1 C13 C18 132.59(17) . . . . ? 
Al1 P1 C13 C18 -0.12(14) . . . . ? 
C18 C13 C14 C15 1.8(4) . . . . ? 
P1 C13 C14 C15 -179.11(19) . . . . ? 
C13 C14 C15 C16 -0.2(4) . . . . ? 
C14 C15 C16 C17 -0.8(4) . . . . ? 
C15 C16 C17 C18 0.4(4) . . . . ? 
C16 C17 C18 C13 1.0(3) . . . . ? 
C16 C17 C18 Al1 179.13(19) . . . . ? 
C14 C13 C18 C17 -2.1(3) . . . . ? 
P1 C13 C18 C17 178.63(16) . . . . ? 
C14 C13 C18 Al1 179.43(18) . . . . ? 
P1 C13 C18 Al1 0.2(2) . . . . ? 
C19 Al1 C18 C17 96.7(2) . . . . ? 
C37 Al1 C18 C17 -93.4(2) . . . . ? 
P3 Al1 C18 C17 -21.6(2) . . . . ? 
P1 Al1 C18 C17 -178.3(2) . . . . ? 
C19 Al1 C18 C13 -85.16(18) . . . . ? 
C37 Al1 C18 C13 84.80(18) . . . . ? 
P3 Al1 C18 C13 156.59(14) . . . . ? 
P1 Al1 C18 C13 -0.11(13) . . . . ? 
C18 Al1 C19 C20 134.40(17) . . . . ? 
C37 Al1 C19 C20 -35.9(2) . . . . ? 
P3 Al1 C19 C20 -106.41(17) . . . . ? 
P1 Al1 C19 C20 67.42(18) . . . . ? 
C18 Al1 C19 C24 -56.6(2) . . . . ? 
C37 Al1 C19 C24 133.1(2) . . . . ? 
P3 Al1 C19 C24 62.6(2) . . . . ? 
P1 Al1 C19 C24 -123.55(19) . . . . ? 
C24 C19 C20 C21 -2.1(3) . . . . ? 
Al1 C19 C20 C21 167.95(19) . . . . ? 
C19 C20 C21 C22 -2.0(4) . . . . ? 
C20 C21 C22 C23 3.8(4) . . . . ? 
C21 C22 C23 C24 -1.3(4) . . . . ? 
C22 C23 C24 C19 -2.9(4) . . . . ? 
C22 C23 C24 P2 174.28(19) . . . . ? 
C20 C19 C24 C23 4.6(3) . . . . ? 
Al1 C19 C24 C23 -164.54(18) . . . . ? 
C20 C19 C24 P2 -172.82(17) . . . . ? 
Al1 C19 C24 P2 18.1(3) . . . . ? 
C31 P2 C24 C23 -77.4(2) . . . . ? 
C25 P2 C24 C23 28.3(2) . . . . ? 
C31 P2 C24 C19 99.98(19) . . . . ? 
C25 P2 C24 C19 -154.31(18) . . . . ? 
C31 P2 C25 C30 -5.4(3) . . . . ? 
C24 P2 C25 C30 -110.0(2) . . . . ? 
C31 P2 C25 C26 176.2(2) . . . . ? 
C24 P2 C25 C26 71.5(2) . . . . ? 
C30 C25 C26 C27 2.0(4) . . . . ? 
P2 C25 C26 C27 -179.4(2) . . . . ? 
C25 C26 C27 C28 -1.9(5) . . . . ? 
C26 C27 C28 C29 1.0(5) . . . . ? 
C27 C28 C29 C30 -0.3(5) . . . . ? 
C26 C25 C30 C29 -1.3(4) . . . . ? 
P2 C25 C30 C29 -179.7(2) . . . . ? 
C28 C29 C30 C25 0.5(5) . . . . ? 
C24 P2 C31 C32 -177.4(2) . . . . ? 
C25 P2 C31 C32 77.8(3) . . . . ? 
C24 P2 C31 C36 1.0(2) . . . . ? 
C25 P2 C31 C36 -103.9(2) . . . . ? 
C36 C31 C32 C33 1.7(5) . . . . ? 
P2 C31 C32 C33 -179.8(3) . . . . ? 
C31 C32 C33 C34 0.0(6) . . . . ? 
C32 C33 C34 C35 -2.2(6) . . . . ? 
C33 C34 C35 C36 2.7(5) . . . . ? 
C34 C35 C36 C31 -0.9(4) . . . . ? 
C32 C31 C36 C35 -1.3(4) . . . . ? 
P2 C31 C36 C35 -179.7(2) . . . . ? 
C19 Al1 C37 C38 81.4(2) . . . . ? 
C18 Al1 C37 C38 -90.0(2) . . . . ? 
P3 Al1 C37 C38 175.1(2) . . . . ? 
P1 Al1 C37 C38 -24.7(2) . . . . ? 
C19 Al1 C37 C42 -97.58(16) . . . . ? 
C18 Al1 C37 C42 91.04(16) . . . . ? 
P3 Al1 C37 C42 -3.85(12) . . . . ? 
P1 Al1 C37 C42 156.34(13) . . . . ? 
C42 C37 C38 C39 -1.5(3) . . . . ? 
Al1 C37 C38 C39 179.67(18) . . . . ? 
C37 C38 C39 C40 -0.1(4) . . . . ? 
C38 C39 C40 C41 1.8(4) . . . . ? 
C39 C40 C41 C42 -1.8(4) . . . . ? 
C40 C41 C42 C37 0.2(3) . . . . ? 
C40 C41 C42 P3 174.25(19) . . . . ? 
C38 C37 C42 C41 1.4(3) . . . . ? 
Al1 C37 C42 C41 -179.39(18) . . . . ? 
C38 C37 C42 P3 -173.75(17) . . . . ? 
Al1 C37 C42 P3 5.42(17) . . . . ? 
C49 P3 C42 C41 53.1(2) . . . . ? 
C43 P3 C42 C41 -58.6(2) . . . . ? 
Al1 P3 C42 C41 -178.8(2) . . . . ? 
C49 P3 C42 C37 -132.14(15) . . . . ? 
C43 P3 C42 C37 116.16(15) . . . . ? 
Al1 P3 C42 C37 -4.04(13) . . . . ? 
C49 P3 C43 C48 2.1(2) . . . . ? 
C42 P3 C43 C48 120.1(2) . . . . ? 
Al1 P3 C43 C48 -157.73(18) . . . . ? 
C49 P3 C43 C44 178.80(18) . . . . ? 
C42 P3 C43 C44 -63.3(2) . . . . ? 
Al1 P3 C43 C44 18.9(2) . . . . ? 
C48 C43 C44 C45 -0.1(4) . . . . ? 
P3 C43 C44 C45 -176.93(19) . . . . ? 
C43 C44 C45 C46 0.8(4) . . . . ? 
C44 C45 C46 C47 -1.2(4) . . . . ? 
C45 C46 C47 C48 0.8(4) . . . . ? 
C44 C43 C48 C47 -0.3(4) . . . . ? 
P3 C43 C48 C47 176.3(2) . . . . ? 
C46 C47 C48 C43 0.0(4) . . . . ? 
C42 P3 C49 C50 -12.0(2) . . . . ? 
C43 P3 C49 C50 100.7(2) . . . . ? 
Al1 P3 C49 C50 -101.7(2) . . . . ? 
C42 P3 C49 C54 168.48(17) . . . . ? 
C43 P3 C49 C54 -78.81(19) . . . . ? 
Al1 P3 C49 C54 78.75(19) . . . . ? 
C54 C49 C50 C51 1.1(4) . . . . ? 
P3 C49 C50 C51 -178.49(19) . . . . ? 
C49 C50 C51 C52 -0.7(4) . . . . ? 
C50 C51 C52 C53 0.3(4) . . . . ? 
C51 C52 C53 C54 -0.3(4) . . . . ? 
C52 C53 C54 C49 0.6(4) . . . . ? 
C50 C49 C54 C53 -1.0(4) . . . . ? 
P3 C49 C54 C53 178.55(19) . . . . ? 
C67 P4 C55 C60 119.0(2) . . . . ? 
C61 P4 C55 C60 5.6(2) . . . . ? 
Al2 P4 C55 C60 -158.56(17) . . . . ? 
C67 P4 C55 C56 -65.0(2) . . . . ? 
C61 P4 C55 C56 -178.38(19) . . . . ? 
Al2 P4 C55 C56 17.4(2) . . . . ? 
C60 C55 C56 C57 -0.7(4) . . . . ? 
P4 C55 C56 C57 -176.9(2) . . . . ? 
C55 C56 C57 C58 0.3(4) . . . . ? 
C56 C57 C58 C59 0.3(4) . . . . ? 
C57 C58 C59 C60 -0.5(4) . . . . ? 
C56 C55 C60 C59 0.4(4) . . . . ? 
P4 C55 C60 C59 176.39(19) . . . . ? 
C58 C59 C60 C55 0.1(4) . . . . ? 
C67 P4 C61 C62 163.37(19) . . . . ? 
C55 P4 C61 C62 -83.9(2) . . . . ? 
Al2 P4 C61 C62 81.6(2) . . . . ? 
C67 P4 C61 C66 -15.2(2) . . . . ? 
C55 P4 C61 C66 97.5(2) . . . . ? 
Al2 P4 C61 C66 -97.0(2) . . . . ? 
C66 C61 C62 C63 0.0(4) . . . . ? 
P4 C61 C62 C63 -178.7(2) . . . . ? 
C61 C62 C63 C64 0.1(4) . . . . ? 
C62 C63 C64 C65 -0.1(4) . . . . ? 
C63 C64 C65 C66 0.0(4) . . . . ? 
C62 C61 C66 C65 -0.1(4) . . . . ? 
P4 C61 C66 C65 178.5(2) . . . . ? 
C64 C65 C66 C61 0.1(4) . . . . ? 
C61 P4 C67 C68 64.6(2) . . . . ? 
C55 P4 C67 C68 -46.4(2) . . . . ? 
Al2 P4 C67 C68 -174.3(2) . . . . ? 
C61 P4 C67 C72 -114.90(17) . . . . ? 
C55 P4 C67 C72 134.07(17) . . . . ? 
Al2 P4 C67 C72 6.15(14) . . . . ? 
C72 C67 C68 C69 3.8(4) . . . . ? 
P4 C67 C68 C69 -175.64(19) . . . . ? 
C67 C68 C69 C70 -1.0(4) . . . . ? 
C68 C69 C70 C71 -1.9(4) . . . . ? 
C69 C70 C71 C72 2.2(4) . . . . ? 
C70 C71 C72 C67 0.5(3) . . . . ? 
C70 C71 C72 Al2 -173.54(19) . . . . ? 
C68 C67 C72 C71 -3.5(3) . . . . ? 
P4 C67 C72 C71 176.04(17) . . . . ? 
C68 C67 C72 Al2 171.85(19) . . . . ? 
P4 C67 C72 Al2 -8.6(2) . . . . ? 
C91 Al2 C72 C71 -83.2(3) . . . . ? 
C73 Al2 C72 C71 95.0(2) . . . . ? 
P6 Al2 C72 C71 -13.7(2) . . . . ? 
P4 Al2 C72 C71 -179.8(3) . . . . ? 
C91 Al2 C72 C67 102.55(18) . . . . ? 
C73 Al2 C72 C67 -79.27(18) . . . . ? 
P6 Al2 C72 C67 171.97(15) . . . . ? 
P4 Al2 C72 C67 5.90(14) . . . . ? 
C91 Al2 C73 C78 144.02(18) . . . . ? 
C72 Al2 C73 C78 -34.1(2) . . . . ? 
P6 Al2 C73 C78 73.38(19) . . . . ? 
P4 Al2 C73 C78 -99.90(18) . . . . ? 
C91 Al2 C73 C74 -42.6(3) . . . . ? 
C72 Al2 C73 C74 139.4(2) . . . . ? 
P6 Al2 C73 C74 -113.2(2) . . . . ? 
P4 Al2 C73 C74 73.5(2) . . . . ? 
C78 C73 C74 C75 1.0(4) . . . . ? 
Al2 C73 C74 C75 -172.39(19) . . . . ? 
C78 C73 C74 P5 -176.90(18) . . . . ? 
Al2 C73 C74 P5 9.7(3) . . . . ? 
C79 P5 C74 C75 -67.2(2) . . . . ? 
C85 P5 C74 C75 40.4(2) . . . . ? 
C79 P5 C74 C73 110.8(2) . . . . ? 
C85 P5 C74 C73 -141.7(2) . . . . ? 
C73 C74 C75 C76 -0.1(4) . . . . ? 
P5 C74 C75 C76 177.8(2) . . . . ? 
C74 C75 C76 C77 -0.7(4) . . . . ? 
C75 C76 C77 C78 0.4(4) . . . . ? 
C76 C77 C78 C73 0.6(4) . . . . ? 
C74 C73 C78 C77 -1.3(4) . . . . ? 
Al2 C73 C78 C77 172.7(2) . . . . ? 
C85 P5 C79 C80 -132.0(2) . . . . ? 
C74 P5 C79 C80 -26.2(2) . . . . ? 
C85 P5 C79 C84 53.9(2) . . . . ? 
C74 P5 C79 C84 159.7(2) . . . . ? 
C84 C79 C80 C81 -1.9(4) . . . . ? 
P5 C79 C80 C81 -176.2(2) . . . . ? 
C79 C80 C81 C82 -0.3(5) . . . . ? 
C80 C81 C82 C83 1.6(5) . . . . ? 
C81 C82 C83 C84 -0.6(5) . . . . ? 
C82 C83 C84 C79 -1.6(5) . . . . ? 
C80 C79 C84 C83 2.8(4) . . . . ? 
P5 C79 C84 C83 177.2(2) . . . . ? 
C79 P5 C85 C86 6.5(3) . . . . ? 
C74 P5 C85 C86 -98.5(2) . . . . ? 
C79 P5 C85 C90 -172.96(19) . . . . ? 
C74 P5 C85 C90 82.0(2) . . . . ? 
C90 C85 C86 C87 0.0(4) . . . . ? 
P5 C85 C86 C87 -179.5(2) . . . . ? 
C85 C86 C87 C88 -2.4(4) . . . . ? 
C86 C87 C88 C89 3.0(4) . . . . ? 
C87 C88 C89 C90 -1.2(4) . . . . ? 
C88 C89 C90 C85 -1.2(5) . . . . ? 
C86 C85 C90 C89 1.8(4) . . . . ? 
P5 C85 C90 C89 -178.7(2) . . . . ? 
C73 Al2 C91 C96 -85.32(19) . . . . ? 
C72 Al2 C91 C96 92.57(19) . . . . ? 
P6 Al2 C91 C96 3.90(14) . . . . ? 
P4 Al2 C91 C96 164.78(14) . . . . ? 
C73 Al2 C91 C92 94.3(3) . . . . ? 
C72 Al2 C91 C92 -87.8(3) . . . . ? 
P6 Al2 C91 C92 -176.5(3) . . . . ? 
P4 Al2 C91 C92 -15.6(3) . . . . ? 
C96 C91 C92 C93 1.2(3) . . . . ? 
Al2 C91 C92 C93 -178.46(19) . . . . ? 
C91 C92 C93 C94 0.3(4) . . . . ? 
C92 C93 C94 C95 -0.9(4) . . . . ? 
C93 C94 C95 C96 0.0(4) . . . . ? 
C94 C95 C96 C91 1.6(4) . . . . ? 
C94 C95 C96 P6 -174.5(2) . . . . ? 
C92 C91 C96 C95 -2.1(3) . . . . ? 
Al2 C91 C96 C95 177.58(19) . . . . ? 
C92 C91 C96 P6 174.74(17) . . . . ? 
Al2 C91 C96 P6 -5.5(2) . . . . ? 
C103 P6 C96 C95 -48.3(3) . . . . ? 
C97 P6 C96 C95 61.4(3) . . . . ? 
Al2 P6 C96 C95 -179.4(2) . . . . ? 
C103 P6 C96 C91 135.16(17) . . . . ? 
C97 P6 C96 C91 -115.21(17) . . . . ? 
Al2 P6 C96 C91 4.02(14) . . . . ? 
C96 P6 C97 C98 29.3(2) . . . . ? 
C103 P6 C97 C98 145.2(2) . . . . ? 
Al2 P6 C97 C98 -51.6(2) . . . . ? 
C96 P6 C97 C102 -157.1(2) . . . . ? 
C103 P6 C97 C102 -41.2(2) . . . . ? 
Al2 P6 C97 C102 122.01(18) . . . . ? 
C102 C97 C98 C99 1.6(4) . . . . ? 
P6 C97 C98 C99 175.41(19) . . . . ? 
C97 C98 C99 C100 1.3(4) . . . . ? 
C98 C99 C100 C101 -3.2(4) . . . . ? 
C99 C100 C101 C102 2.1(4) . . . . ? 
C100 C101 C102 C97 0.9(4) . . . . ? 
C98 C97 C102 C101 -2.7(4) . . . . ? 
P6 C97 C102 C101 -176.56(19) . . . . ? 
C96 P6 C103 C108 -116.5(2) . . . . ? 
C97 P6 C103 C108 131.9(2) . . . . ? 
Al2 P6 C103 C108 -28.2(3) . . . . ? 
C96 P6 C103 C104 68.1(2) . . . . ? 
C97 P6 C103 C104 -43.4(2) . . . . ? 
Al2 P6 C103 C104 156.38(17) . . . . ? 
C108 C103 C104 C105 -1.0(4) . . . . ? 
P6 C103 C104 C105 174.4(2) . . . . ? 
C103 C104 C105 C106 -0.5(4) . . . . ? 
C104 C105 C106 C107 1.8(4) . . . . ? 
C105 C106 C107 C108 -1.7(4) . . . . ? 
C104 C103 C108 C107 1.1(4) . . . . ? 
P6 C103 C108 C107 -174.5(2) . . . . ? 
C106 C107 C108 C103 0.2(4) . . . . ? 
 
_diffrn_measured_fraction_theta_max    0.989 
_diffrn_reflns_theta_full              26.38 
_diffrn_measured_fraction_theta_full   0.989 
_refine_diff_density_max    0.347 
_refine_diff_density_min   -0.473 
_refine_diff_density_rms    0.058 

loop_
  _platon_squeeze_void_nr
  _platon_squeeze_void_average_x
  _platon_squeeze_void_average_y
  _platon_squeeze_void_average_z
  _platon_squeeze_void_volume
  _platon_squeeze_void_count_electrons
  _platon_squeeze_void_content
   1  0.000  0.500  0.500       189        31 ' '
   2  0.173  0.878  0.921        14         0 ' '
   3  0.370  0.855  0.435        10         1 ' '
   4  0.630  0.145  0.565        10         1 ' '
   5  0.827  0.122  0.079        14         0 ' '
_platon_squeeze_details
;
The heavily disordered guest molecule of Toluene was squeezed out of the 
crystal srtucture in order to improve the structural model.
;
# ===== < END of CIF >

 
data_II 
 
_audit_creation_method            SHELXL-97 
_chemical_name_systematic 
; 
 ? 
; 
_chemical_name_common             ? 
_chemical_melting_point           ? 
_chemical_formula_moiety          '4(C24 H30 Al B3 O12), C7 H7' 
_chemical_formula_sum             'C103 H127 Al4 B12 O48' 
_chemical_formula_weight          2370.69 
 
loop_ 
 _atom_type_symbol 
 _atom_type_description 
 _atom_type_scat_dispersion_real 
 _atom_type_scat_dispersion_imag 
 _atom_type_scat_source 
 'C'  'C'   0.0033   0.0016 
 'International Tables Vol C Tables 4.2.6.8 and 6.1.1.4' 
 'H'  'H'   0.0000   0.0000 
 'International Tables Vol C Tables 4.2.6.8 and 6.1.1.4' 
 'B'  'B'   0.0013   0.0007 
 'International Tables Vol C Tables 4.2.6.8 and 6.1.1.4' 
 'O'  'O'   0.0106   0.0060 
 'International Tables Vol C Tables 4.2.6.8 and 6.1.1.4' 
 'Al'  'Al'   0.0645   0.0514 
 'International Tables Vol C Tables 4.2.6.8 and 6.1.1.4' 
 
_symmetry_cell_setting            triclinic 
_symmetry_space_group_name_H-M    'P -1' 
_symmetry_space_group_name_HALL   '-P 1'
 
loop_ 
 _symmetry_equiv_pos_as_xyz 
 'x, y, z' 
 '-x, -y, -z' 
 
_cell_length_a                    12.49960(10) 
_cell_length_b                    13.9779(2) 
_cell_length_c                    16.8699(2) 
_cell_angle_alpha                 95.1040(10) 
_cell_angle_beta                  96.6310(10) 
_cell_angle_gamma                 90.8690(10) 
_cell_volume                      2915.19(6) 
_cell_formula_units_Z             1 
_cell_measurement_temperature     150(2) 
_cell_measurement_reflns_used     9913 
_cell_measurement_theta_min       2.8 
_cell_measurement_theta_max       26.3 
 
_exptl_crystal_description        block 
_exptl_crystal_colour             colorless 
_exptl_crystal_size_max           0.42 
_exptl_crystal_size_mid           0.40 
_exptl_crystal_size_min           0.38 
_exptl_crystal_density_meas       ? 
_exptl_crystal_density_diffrn     1.350 
_exptl_crystal_density_method     'not measured' 
_exptl_crystal_F_000              1241 
_exptl_absorpt_coefficient_mu     0.131 
_exptl_absorpt_correction_type    multi-scan 
_exptl_absorpt_correction_T_min   0.9470 
_exptl_absorpt_correction_T_max   0.9519 
_exptl_absorpt_process_details    'SADABS (Sheldrick, 1996)' 
 
_exptl_special_details 
; 
 ? 
; 
 
_diffrn_ambient_temperature       150(2) 
_diffrn_radiation_wavelength      0.71073 
_diffrn_radiation_type            MoK\a 
_diffrn_radiation_source          'fine-focus sealed tube' 
_diffrn_radiation_monochromator   graphite 
_diffrn_measurement_device_type   'Bruker APEX II CCD area detector' 
_diffrn_measurement_method        'phi and omega scans' 
_diffrn_detector_area_resol_mean  ? 
_diffrn_reflns_number             46769 
_diffrn_reflns_av_R_equivalents   0.0366 
_diffrn_reflns_av_sigmaI/netI     0.0380 
_diffrn_reflns_limit_h_min        -15 
_diffrn_reflns_limit_h_max        15 
_diffrn_reflns_limit_k_min        -17 
_diffrn_reflns_limit_k_max        17 
_diffrn_reflns_limit_l_min        -21 
_diffrn_reflns_limit_l_max        20 
_diffrn_reflns_theta_min          1.46 
_diffrn_reflns_theta_max          26.38 
_reflns_number_total              11901 
_reflns_number_gt                 8946 
_reflns_threshold_expression      >2sigma(I) 
 
_computing_data_collection        'SMART APEX II  (Bruker, 2007)' 
_computing_cell_refinement        'SMART APEX II' 
_computing_data_reduction         'SAINT+ (Bruker, 2007)' 
_computing_structure_solution     'SHELXS-97 (Sheldrick, 2008)' 
_computing_structure_refinement   'SHELXL-97 (Sheldrick, 2008)' 
_computing_molecular_graphics     'SHELXTL (Bruker, 2007)' 
_computing_publication_material   SHELXTL 
 
_refine_special_details 
; 
 Refinement of F^2^ against ALL reflections.  The weighted R-factor wR and 
 goodness of fit S are based on F^2^, conventional R-factors R are based 
 on F, with F set to zero for negative F^2^. The threshold expression of 
 F^2^ > 2sigma(F^2^) is used only for calculating R-factors(gt) etc. and is 
 not relevant to the choice of reflections for refinement.  R-factors based 
 on F^2^ are statistically about twice as large as those based on F, and R- 
 factors based on ALL data will be even larger. 
; 
 
_refine_ls_structure_factor_coef  Fsqd  
_refine_ls_matrix_type            full 
_refine_ls_weighting_scheme       calc  
_refine_ls_weighting_details 
 'calc w=1/[\s^2^(Fo^2^)+(0.0511P)^2^+0.9985P] where P=(Fo^2^+2Fc^2^)/3' 
_atom_sites_solution_primary      direct 
_atom_sites_solution_secondary    difmap 
_atom_sites_solution_hydrogens    geom 
_refine_ls_hydrogen_treatment     mixed 
_refine_ls_extinction_method      none 
_refine_ls_extinction_coef        ? 
_refine_ls_number_reflns          11901 
_refine_ls_number_parameters      770 
_refine_ls_number_restraints      0 
_refine_ls_R_factor_all           0.0615 
_refine_ls_R_factor_gt            0.0431 
_refine_ls_wR_factor_ref          0.1151 
_refine_ls_wR_factor_gt           0.1049 
_refine_ls_goodness_of_fit_ref    1.038 
_refine_ls_restrained_S_all       1.038 
_refine_ls_shift/su_max           0.004 
_refine_ls_shift/su_mean          0.000 
 
loop_ 
 _atom_site_label 
 _atom_site_type_symbol 
 _atom_site_fract_x 
 _atom_site_fract_y 
 _atom_site_fract_z 
 _atom_site_U_iso_or_equiv 
 _atom_site_adp_type 
 _atom_site_occupancy 
 _atom_site_symmetry_multiplicity 
 _atom_site_calc_flag 
 _atom_site_refinement_flags 
 _atom_site_disorder_assembly 
 _atom_site_disorder_group 
Al1 Al -0.59671(4) 0.50050(4) 0.25661(3) 0.02740(14) Uani 1 1 d . . . 
Al2 Al -0.08529(4) 0.03288(4) 0.22503(3) 0.02572(13) Uani 1 1 d . . . 
O1 O -0.51365(10) 0.49259(9) 0.17176(8) 0.0312(3) Uani 1 1 d . . . 
O2 O -0.57324(10) 0.37057(9) 0.22490(7) 0.0274(3) Uani 1 1 d . . . 
O3 O -0.72514(10) 0.51932(10) 0.19302(7) 0.0325(3) Uani 1 1 d . . . 
O4 O -0.71255(10) 0.47967(10) 0.31434(8) 0.0340(3) Uani 1 1 d . . . 
O5 O -0.56713(11) 0.62975(9) 0.29323(8) 0.0345(3) Uani 1 1 d . . . 
O6 O -0.48538(10) 0.50938(9) 0.34171(8) 0.0325(3) Uani 1 1 d . . . 
O7 O -0.41197(10) 0.34618(9) 0.15145(7) 0.0312(3) Uani 1 1 d . . . 
O8 O -0.58193(10) 0.35234(10) 0.07835(8) 0.0324(3) Uani 1 1 d . . . 
O9 O -0.88170(10) 0.42957(9) 0.22720(8) 0.0354(3) Uani 1 1 d . . . 
O10 O -0.85803(10) 0.59150(9) 0.27560(8) 0.0334(3) Uani 1 1 d . . . 
O11 O -0.50151(10) 0.64950(10) 0.43833(8) 0.0339(3) Uani 1 1 d . . . 
O12 O -0.37656(11) 0.65989(10) 0.34622(8) 0.0365(3) Uani 1 1 d . . . 
O13 O 0.00407(10) 0.14056(9) 0.22020(7) 0.0282(3) Uani 1 1 d . . . 
O14 O -0.07287(10) 0.04951(9) 0.11756(7) 0.0288(3) Uani 1 1 d . . . 
O15 O -0.20726(10) -0.04867(9) 0.20439(8) 0.0316(3) Uani 1 1 d . . . 
O16 O -0.20751(10) 0.10402(9) 0.23899(8) 0.0323(3) Uani 1 1 d . . . 
O17 O -0.04727(10) 0.01621(9) 0.33300(7) 0.0294(3) Uani 1 1 d . . . 
O18 O 0.01941(10) -0.06091(9) 0.23471(7) 0.0295(3) Uani 1 1 d . . . 
O19 O 0.09468(10) 0.13863(9) 0.09807(7) 0.0298(3) Uani 1 1 d . . . 
O20 O -0.06603(10) 0.22149(9) 0.10069(7) 0.0292(3) Uani 1 1 d . . . 
O21 O -0.36284(10) 0.03977(10) 0.14645(8) 0.0346(3) Uani 1 1 d . . . 
O22 O -0.35552(11) 0.00810(11) 0.28045(8) 0.0381(3) Uani 1 1 d . . . 
O23 O 0.01541(10) -0.14784(9) 0.35504(8) 0.0313(3) Uani 1 1 d . . . 
O24 O 0.14348(10) -0.02341(9) 0.35940(8) 0.0315(3) Uani 1 1 d . . . 
C52 C 0.0223(6) 0.3435(5) 0.4150(4) 0.080(2) Uani 0.50 1 d P . . 
H52A H -0.0487 0.3118 0.4013 0.120 Uiso 0.50 1 calc PR . . 
H52B H 0.0711 0.3007 0.4439 0.120 Uiso 0.50 1 calc PR . . 
H52C H 0.0514 0.3582 0.3659 0.120 Uiso 0.50 1 calc PR . . 
C1 C -0.4600(2) 0.55659(16) 0.12727(14) 0.0470(6) Uani 1 1 d . . . 
H1A H -0.3907 0.5300 0.1158 0.070 Uiso 1 1 calc R . . 
H1B H -0.4476 0.6190 0.1586 0.070 Uiso 1 1 calc R . . 
H1C H -0.5047 0.5647 0.0768 0.070 Uiso 1 1 calc R . . 
C2 C -0.63329(18) 0.28278(15) 0.22817(13) 0.0400(5) Uani 1 1 d . . . 
H2A H -0.6922 0.2763 0.1842 0.060 Uiso 1 1 calc R . . 
H2B H -0.6630 0.2841 0.2795 0.060 Uiso 1 1 calc R . . 
H2C H -0.5856 0.2282 0.2230 0.060 Uiso 1 1 calc R . . 
C3 C -0.76203(18) 0.53274(19) 0.11144(13) 0.0495(6) Uani 1 1 d . . . 
H3A H -0.8242 0.4897 0.0928 0.074 Uiso 1 1 calc R . . 
H3B H -0.7040 0.5182 0.0781 0.074 Uiso 1 1 calc R . . 
H3C H -0.7832 0.5995 0.1074 0.074 Uiso 1 1 calc R . . 
C4 C -0.72526(19) 0.48464(19) 0.39825(12) 0.0482(6) Uani 1 1 d . . . 
H4A H -0.7852 0.5263 0.4090 0.072 Uiso 1 1 calc R . . 
H4B H -0.6588 0.5109 0.4297 0.072 Uiso 1 1 calc R . . 
H4C H -0.7404 0.4201 0.4132 0.072 Uiso 1 1 calc R . . 
C5 C -0.62000(19) 0.72004(15) 0.28768(14) 0.0426(5) Uani 1 1 d . . . 
H5A H -0.6622 0.7321 0.3329 0.064 Uiso 1 1 calc R . . 
H5B H -0.6680 0.7177 0.2373 0.064 Uiso 1 1 calc R . . 
H5C H -0.5658 0.7718 0.2891 0.064 Uiso 1 1 calc R . . 
C6 C -0.40364(18) 0.44859(16) 0.37385(14) 0.0452(6) Uani 1 1 d . . . 
H6A H -0.3327 0.4793 0.3735 0.068 Uiso 1 1 calc R . . 
H6B H -0.4075 0.3868 0.3411 0.068 Uiso 1 1 calc R . . 
H6C H -0.4147 0.4380 0.4290 0.068 Uiso 1 1 calc R . . 
C7 C 0.09426(17) 0.18734(16) 0.26957(13) 0.0422(5) Uani 1 1 d . . . 
H7A H 0.1608 0.1563 0.2570 0.063 Uiso 1 1 calc R . . 
H7B H 0.0857 0.1826 0.3261 0.063 Uiso 1 1 calc R . . 
H7C H 0.0979 0.2552 0.2593 0.063 Uiso 1 1 calc R . . 
C8 C -0.14383(17) 0.02699(15) 0.04454(11) 0.0351(5) Uani 1 1 d . . . 
H8A H -0.2087 0.0652 0.0460 0.053 Uiso 1 1 calc R . . 
H8B H -0.1640 -0.0415 0.0392 0.053 Uiso 1 1 calc R . . 
H8C H -0.1070 0.0419 -0.0013 0.053 Uiso 1 1 calc R . . 
C9 C -0.22856(18) -0.14819(15) 0.21005(14) 0.0421(5) Uani 1 1 d . . . 
H9A H -0.2337 -0.1591 0.2661 0.063 Uiso 1 1 calc R . . 
H9B H -0.1699 -0.1859 0.1905 0.063 Uiso 1 1 calc R . . 
H9C H -0.2966 -0.1679 0.1775 0.063 Uiso 1 1 calc R . . 
C10 C -0.23636(18) 0.20114(15) 0.25941(13) 0.0404(5) Uani 1 1 d . . . 
H10A H -0.2945 0.2193 0.2199 0.061 Uiso 1 1 calc R . . 
H10B H -0.1735 0.2440 0.2595 0.061 Uiso 1 1 calc R . . 
H10C H -0.2608 0.2065 0.3127 0.061 Uiso 1 1 calc R . . 
C11 C -0.09154(19) 0.04024(18) 0.40624(12) 0.0455(6) Uani 1 1 d . . . 
H11A H -0.1036 -0.0185 0.4320 0.068 Uiso 1 1 calc R . . 
H11B H -0.1602 0.0722 0.3950 0.068 Uiso 1 1 calc R . . 
H11C H -0.0412 0.0835 0.4420 0.068 Uiso 1 1 calc R . . 
C12 C 0.07311(17) -0.12668(16) 0.18333(12) 0.0385(5) Uani 1 1 d . . . 
H12A H 0.1482 -0.1051 0.1841 0.058 Uiso 1 1 calc R . . 
H12B H 0.0368 -0.1290 0.1285 0.058 Uiso 1 1 calc R . . 
H12C H 0.0710 -0.1909 0.2023 0.058 Uiso 1 1 calc R . . 
C13 C -0.41360(16) 0.29569(14) 0.07728(11) 0.0306(4) Uani 1 1 d . . . 
C14 C -0.33014(18) 0.25016(16) 0.04475(13) 0.0419(5) Uani 1 1 d . . . 
H14 H -0.2598 0.2506 0.0729 0.050 Uiso 1 1 calc R . . 
C15 C -0.3543(2) 0.20292(17) -0.03229(14) 0.0500(6) Uani 1 1 d . . . 
H15 H -0.2985 0.1711 -0.0571 0.060 Uiso 1 1 calc R . . 
C16 C -0.4563(2) 0.20127(15) -0.07287(13) 0.0448(6) Uani 1 1 d . . . 
H16 H -0.4701 0.1670 -0.1244 0.054 Uiso 1 1 calc R . . 
C17 C -0.53949(18) 0.24921(14) -0.03939(12) 0.0370(5) Uani 1 1 d . . . 
H17 H -0.6101 0.2486 -0.0672 0.044 Uiso 1 1 calc R . . 
C18 C -0.51566(16) 0.29727(13) 0.03523(11) 0.0295(4) Uani 1 1 d . . . 
C19 C -0.97994(15) 0.47218(14) 0.22880(11) 0.0294(4) Uani 1 1 d . . . 
C20 C -1.08052(16) 0.43146(15) 0.20593(12) 0.0341(5) Uani 1 1 d . . . 
H20 H -1.0897 0.3661 0.1850 0.041 Uiso 1 1 calc R . . 
C21 C -1.16890(16) 0.48987(15) 0.21470(12) 0.0371(5) Uani 1 1 d . . . 
H21 H -1.2397 0.4638 0.1999 0.044 Uiso 1 1 calc R . . 
C22 C -1.15472(16) 0.58515(15) 0.24462(12) 0.0351(5) Uani 1 1 d . . . 
H22 H -1.2161 0.6233 0.2502 0.042 Uiso 1 1 calc R . . 
C23 C -1.05211(15) 0.62637(14) 0.26685(11) 0.0299(4) Uani 1 1 d . . . 
H23 H -1.0423 0.6919 0.2870 0.036 Uiso 1 1 calc R . . 
C24 C -0.96624(15) 0.56826(13) 0.25835(11) 0.0278(4) Uani 1 1 d . . . 
C25 C -0.41779(15) 0.71126(14) 0.46984(11) 0.0295(4) Uani 1 1 d . . . 
C26 C -0.40318(16) 0.76176(15) 0.54405(12) 0.0354(5) Uani 1 1 d . . . 
H26 H -0.4538 0.7568 0.5815 0.043 Uiso 1 1 calc R . . 
C27 C -0.31096(18) 0.82052(16) 0.56216(13) 0.0428(5) Uani 1 1 d . . . 
H27 H -0.2986 0.8570 0.6128 0.051 Uiso 1 1 calc R . . 
C28 C -0.23748(18) 0.82662(16) 0.50795(14) 0.0448(6) Uani 1 1 d . . . 
H28 H -0.1754 0.8673 0.5220 0.054 Uiso 1 1 calc R . . 
C29 C -0.25189(17) 0.77452(16) 0.43272(13) 0.0408(5) Uani 1 1 d . . . 
H29 H -0.2008 0.7783 0.3955 0.049 Uiso 1 1 calc R . . 
C30 C -0.34379(16) 0.71741(14) 0.41531(11) 0.0321(4) Uani 1 1 d . . . 
C31 C 0.09374(15) 0.21371(13) 0.05040(11) 0.0277(4) Uani 1 1 d . . . 
C32 C 0.17338(16) 0.24159(15) 0.00718(12) 0.0342(5) Uani 1 1 d . . . 
H32 H 0.2398 0.2094 0.0079 0.041 Uiso 1 1 calc R . . 
C33 C 0.15179(18) 0.31992(15) -0.03812(12) 0.0395(5) Uani 1 1 d . . . 
H33 H 0.2046 0.3409 -0.0694 0.047 Uiso 1 1 calc R . . 
C34 C 0.05589(18) 0.36708(15) -0.03837(12) 0.0388(5) Uani 1 1 d . . . 
H34 H 0.0434 0.4195 -0.0701 0.047 Uiso 1 1 calc R . . 
C35 C -0.02335(17) 0.33893(14) 0.00744(12) 0.0344(5) Uani 1 1 d . . . 
H35 H -0.0892 0.3718 0.0082 0.041 Uiso 1 1 calc R . . 
C36 C -0.00206(15) 0.26196(14) 0.05117(11) 0.0279(4) Uani 1 1 d . . . 
C37 C -0.46484(15) 0.03526(14) 0.16833(12) 0.0323(4) Uani 1 1 d . . . 
C38 C -0.56115(17) 0.04654(15) 0.12151(14) 0.0407(5) Uani 1 1 d . . . 
H38 H -0.5638 0.0611 0.0674 0.049 Uiso 1 1 calc R . . 
C39 C -0.65461(17) 0.03527(16) 0.15856(17) 0.0492(6) Uani 1 1 d . . . 
H39 H -0.7229 0.0423 0.1288 0.059 Uiso 1 1 calc R . . 
C40 C -0.65004(18) 0.01426(17) 0.23684(17) 0.0524(7) Uani 1 1 d . . . 
H40 H -0.7152 0.0066 0.2598 0.063 Uiso 1 1 calc R . . 
C41 C -0.55222(18) 0.00384(16) 0.28341(15) 0.0471(6) Uani 1 1 d . . . 
H41 H -0.5491 -0.0106 0.3376 0.057 Uiso 1 1 calc R . . 
C42 C -0.46073(16) 0.01537(14) 0.24749(12) 0.0347(5) Uani 1 1 d . . . 
C43 C 0.10811(16) -0.16763(14) 0.40361(11) 0.0304(4) Uani 1 1 d . . . 
C44 C 0.12897(19) -0.24695(15) 0.44411(12) 0.0418(5) Uani 1 1 d . . . 
H44 H 0.0781 -0.2988 0.4406 0.050 Uiso 1 1 calc R . . 
C45 C 0.2287(2) -0.24818(18) 0.49088(13) 0.0523(7) Uani 1 1 d . . . 
H45 H 0.2462 -0.3022 0.5199 0.063 Uiso 1 1 calc R . . 
C46 C 0.3015(2) -0.1735(2) 0.49580(14) 0.0522(7) Uani 1 1 d . . . 
H46 H 0.3679 -0.1761 0.5291 0.063 Uiso 1 1 calc R . . 
C47 C 0.28070(17) -0.09358(17) 0.45318(12) 0.0403(5) Uani 1 1 d . . . 
H47 H 0.3317 -0.0420 0.4561 0.048 Uiso 1 1 calc R . . 
C48 C 0.18283(15) -0.09297(14) 0.40677(11) 0.0305(4) Uani 1 1 d . . . 
C49 C 0.0785(3) 0.4446(4) 0.5286(3) 0.1094(17) Uani 1 1 d . . . 
H49 H 0.1338 0.4030 0.5466 0.131 Uiso 1 1 calc R . . 
C50 C 0.0141(4) 0.4166(4) 0.4567(3) 0.1063(14) Uani 1 1 d . . . 
C51 C -0.0668(4) 0.4749(5) 0.4276(3) 0.1181(18) Uani 1 1 d . . . 
H51 H -0.1113 0.4576 0.3788 0.142 Uiso 1 1 calc R . . 
B1 B -0.51786(17) 0.38623(15) 0.15317(13) 0.0277(5) Uani 1 1 d . . . 
B2 B -0.80187(18) 0.50520(17) 0.25276(14) 0.0328(5) Uani 1 1 d . . . 
B3 B -0.47854(18) 0.61610(16) 0.35814(13) 0.0312(5) Uani 1 1 d . . . 
B4 B -0.00721(17) 0.14127(16) 0.13129(12) 0.0273(5) Uani 1 1 d . . . 
B5 B -0.29079(18) 0.02525(17) 0.21737(14) 0.0318(5) Uani 1 1 d . . . 
B6 B 0.03672(17) -0.05730(16) 0.32428(13) 0.0278(5) Uani 1 1 d . . . 
 
loop_ 
 _atom_site_aniso_label 
 _atom_site_aniso_U_11 
 _atom_site_aniso_U_22 
 _atom_site_aniso_U_33 
 _atom_site_aniso_U_23 
 _atom_site_aniso_U_13 
 _atom_site_aniso_U_12 
Al1 0.0276(3) 0.0256(3) 0.0265(3) -0.0033(2) -0.0028(2) 0.0029(2) 
Al2 0.0256(3) 0.0254(3) 0.0257(3) 0.0006(2) 0.0024(2) 0.0021(2) 
O1 0.0345(7) 0.0236(7) 0.0356(7) 0.0015(6) 0.0058(6) -0.0006(6) 
O2 0.0293(7) 0.0236(7) 0.0285(7) -0.0018(5) 0.0029(5) -0.0019(5) 
O3 0.0283(7) 0.0407(8) 0.0263(7) -0.0010(6) -0.0035(5) 0.0048(6) 
O4 0.0319(7) 0.0404(8) 0.0283(7) -0.0004(6) -0.0002(6) 0.0074(6) 
O5 0.0393(8) 0.0257(7) 0.0343(7) -0.0056(6) -0.0084(6) 0.0079(6) 
O6 0.0307(7) 0.0270(7) 0.0355(7) -0.0033(6) -0.0095(6) 0.0046(6) 
O7 0.0274(7) 0.0329(8) 0.0310(7) -0.0047(6) -0.0005(5) 0.0033(6) 
O8 0.0285(7) 0.0366(8) 0.0300(7) -0.0039(6) -0.0006(6) 0.0026(6) 
O9 0.0306(7) 0.0274(8) 0.0453(8) -0.0069(6) -0.0002(6) 0.0046(6) 
O10 0.0250(7) 0.0287(8) 0.0433(8) -0.0072(6) -0.0010(6) 0.0006(6) 
O11 0.0301(7) 0.0359(8) 0.0325(7) -0.0071(6) -0.0008(6) -0.0039(6) 
O12 0.0372(8) 0.0375(8) 0.0321(7) -0.0085(6) 0.0029(6) -0.0038(6) 
O13 0.0275(7) 0.0296(7) 0.0257(6) -0.0013(5) -0.0004(5) -0.0032(5) 
O14 0.0331(7) 0.0270(7) 0.0246(6) -0.0006(5) -0.0011(5) -0.0028(6) 
O15 0.0278(7) 0.0259(7) 0.0410(8) 0.0041(6) 0.0028(6) 0.0006(6) 
O16 0.0276(7) 0.0272(7) 0.0418(8) 0.0008(6) 0.0033(6) 0.0040(6) 
O17 0.0334(7) 0.0314(8) 0.0241(6) 0.0015(5) 0.0061(5) 0.0094(6) 
O18 0.0308(7) 0.0320(8) 0.0250(6) -0.0033(5) 0.0038(5) 0.0081(6) 
O19 0.0301(7) 0.0290(7) 0.0318(7) 0.0061(5) 0.0061(5) 0.0060(6) 
O20 0.0273(7) 0.0267(7) 0.0342(7) 0.0036(6) 0.0044(6) 0.0026(6) 
O21 0.0266(7) 0.0432(9) 0.0348(7) 0.0068(6) 0.0042(6) 0.0019(6) 
O22 0.0327(8) 0.0484(9) 0.0342(8) 0.0070(6) 0.0056(6) 0.0005(7) 
O23 0.0319(7) 0.0270(7) 0.0337(7) 0.0030(6) -0.0012(6) -0.0006(6) 
O24 0.0294(7) 0.0298(8) 0.0341(7) 0.0025(6) -0.0013(6) -0.0015(6) 
C52 0.116(6) 0.067(4) 0.057(4) -0.001(3) 0.017(4) -0.017(4) 
C1 0.0625(15) 0.0348(13) 0.0461(13) 0.0095(10) 0.0131(11) -0.0074(11) 
C2 0.0489(13) 0.0284(11) 0.0427(12) -0.0008(9) 0.0097(10) -0.0114(10) 
C3 0.0422(13) 0.0713(17) 0.0324(11) 0.0046(11) -0.0084(10) 0.0107(12) 
C4 0.0465(14) 0.0691(17) 0.0301(11) 0.0047(11) 0.0077(10) 0.0079(12) 
C5 0.0523(14) 0.0253(11) 0.0474(13) -0.0029(9) -0.0029(10) 0.0095(10) 
C6 0.0407(13) 0.0384(13) 0.0512(13) 0.0011(10) -0.0162(10) 0.0101(10) 
C7 0.0425(13) 0.0434(13) 0.0367(11) 0.0017(9) -0.0094(9) -0.0136(10) 
C8 0.0422(12) 0.0356(12) 0.0248(10) -0.0032(8) -0.0029(8) -0.0033(9) 
C9 0.0425(13) 0.0297(12) 0.0521(13) 0.0007(10) 0.0008(10) -0.0062(10) 
C10 0.0448(13) 0.0288(12) 0.0495(13) 0.0025(9) 0.0130(10) 0.0112(10) 
C11 0.0556(14) 0.0554(15) 0.0279(11) 0.0021(10) 0.0136(10) 0.0224(12) 
C12 0.0398(12) 0.0403(13) 0.0355(11) -0.0051(9) 0.0104(9) 0.0106(10) 
C13 0.0367(11) 0.0255(10) 0.0292(10) -0.0002(8) 0.0044(8) 0.0013(8) 
C14 0.0416(13) 0.0421(13) 0.0429(12) 0.0025(10) 0.0078(10) 0.0134(10) 
C15 0.0641(16) 0.0441(14) 0.0443(13) 0.0001(11) 0.0179(12) 0.0184(12) 
C16 0.0731(17) 0.0311(12) 0.0301(11) -0.0007(9) 0.0081(11) 0.0031(11) 
C17 0.0507(13) 0.0292(11) 0.0298(10) 0.0006(8) 0.0014(9) -0.0071(10) 
C18 0.0340(11) 0.0248(10) 0.0298(10) 0.0031(8) 0.0041(8) -0.0009(8) 
C19 0.0298(10) 0.0264(10) 0.0307(10) -0.0028(8) 0.0029(8) 0.0028(8) 
C20 0.0365(11) 0.0274(11) 0.0367(11) -0.0038(8) 0.0028(9) -0.0066(9) 
C21 0.0291(11) 0.0397(13) 0.0414(12) -0.0011(9) 0.0043(9) -0.0055(9) 
C22 0.0279(10) 0.0392(12) 0.0380(11) 0.0003(9) 0.0043(8) 0.0053(9) 
C23 0.0324(11) 0.0248(10) 0.0314(10) -0.0019(8) 0.0025(8) 0.0014(8) 
C24 0.0260(10) 0.0270(10) 0.0288(10) -0.0015(8) -0.0002(8) -0.0024(8) 
C25 0.0272(10) 0.0261(10) 0.0327(10) -0.0016(8) -0.0043(8) 0.0016(8) 
C26 0.0369(11) 0.0360(12) 0.0309(10) -0.0030(8) -0.0027(9) 0.0052(9) 
C27 0.0495(14) 0.0361(13) 0.0366(12) -0.0085(9) -0.0126(10) 0.0012(10) 
C28 0.0420(13) 0.0360(13) 0.0510(14) -0.0017(10) -0.0108(11) -0.0097(10) 
C29 0.0365(12) 0.0400(13) 0.0450(12) 0.0036(10) 0.0015(9) -0.0065(10) 
C30 0.0363(11) 0.0270(11) 0.0304(10) -0.0034(8) -0.0027(8) 0.0001(9) 
C31 0.0313(10) 0.0255(10) 0.0257(9) 0.0014(7) 0.0013(8) 0.0002(8) 
C32 0.0333(11) 0.0356(12) 0.0342(11) 0.0009(9) 0.0075(8) 0.0003(9) 
C33 0.0464(13) 0.0386(13) 0.0343(11) 0.0030(9) 0.0096(9) -0.0092(10) 
C34 0.0534(14) 0.0301(12) 0.0321(11) 0.0058(9) -0.0006(10) -0.0020(10) 
C35 0.0375(11) 0.0317(11) 0.0328(10) 0.0038(8) -0.0023(9) 0.0046(9) 
C36 0.0284(10) 0.0284(10) 0.0254(9) -0.0010(8) 0.0003(8) -0.0005(8) 
C37 0.0267(10) 0.0255(11) 0.0439(12) -0.0040(8) 0.0061(9) 0.0003(8) 
C38 0.0355(12) 0.0297(12) 0.0526(13) -0.0062(10) -0.0056(10) 0.0040(9) 
C39 0.0240(11) 0.0335(13) 0.0838(19) -0.0176(12) -0.0029(11) 0.0021(9) 
C40 0.0307(13) 0.0420(14) 0.0833(19) -0.0160(13) 0.0191(12) -0.0072(10) 
C41 0.0443(14) 0.0401(13) 0.0589(15) -0.0039(11) 0.0217(11) -0.0051(10) 
C42 0.0284(11) 0.0306(11) 0.0446(12) -0.0011(9) 0.0065(9) -0.0002(9) 
C43 0.0362(11) 0.0288(11) 0.0246(9) -0.0027(8) 0.0005(8) 0.0082(9) 
C44 0.0643(15) 0.0270(11) 0.0334(11) 0.0006(9) 0.0038(10) 0.0105(10) 
C45 0.0741(18) 0.0444(15) 0.0377(12) 0.0045(10) -0.0011(12) 0.0334(14) 
C46 0.0451(14) 0.0674(18) 0.0404(13) -0.0061(12) -0.0062(10) 0.0297(13) 
C47 0.0300(11) 0.0517(14) 0.0372(11) -0.0062(10) 0.0015(9) 0.0095(10) 
C48 0.0313(10) 0.0323(11) 0.0278(10) -0.0022(8) 0.0051(8) 0.0097(9) 
C49 0.071(2) 0.186(5) 0.083(3) 0.085(3) 0.008(2) -0.012(3) 
C50 0.100(3) 0.142(4) 0.087(3) 0.050(3) 0.030(2) -0.035(3) 
C51 0.078(3) 0.199(6) 0.088(3) 0.080(4) 0.011(2) -0.029(3) 
B1 0.0284(11) 0.0245(11) 0.0291(11) -0.0006(9) 0.0013(9) 0.0008(9) 
B2 0.0293(12) 0.0316(13) 0.0346(12) -0.0047(9) -0.0025(9) 0.0030(10) 
B3 0.0328(12) 0.0266(12) 0.0314(11) -0.0049(9) -0.0023(9) 0.0021(9) 
B4 0.0286(11) 0.0269(12) 0.0263(11) 0.0003(8) 0.0040(9) 0.0031(9) 
B5 0.0274(12) 0.0342(13) 0.0341(12) 0.0045(10) 0.0036(9) 0.0002(10) 
B6 0.0272(11) 0.0274(12) 0.0279(11) -0.0002(9) 0.0021(9) 0.0026(9) 
 
_geom_special_details 
; 
 All esds (except the esd in the dihedral angle between two l.s. planes) 
 are estimated using the full covariance matrix.  The cell esds are taken 
 into account individually in the estimation of esds in distances, angles 
 and torsion angles; correlations between esds in cell parameters are only 
 used when they are defined by crystal symmetry.  An approximate (isotropic) 
 treatment of cell esds is used for estimating esds involving l.s. planes. 
; 
 
loop_ 
 _geom_bond_atom_site_label_1 
 _geom_bond_atom_site_label_2 
 _geom_bond_distance 
 _geom_bond_site_symmetry_2 
 _geom_bond_publ_flag 
Al1 O1 1.8593(14) . ? 
Al1 O3 1.8606(13) . ? 
Al1 O4 1.8691(15) . ? 
Al1 O5 1.8737(14) . ? 
Al1 O6 1.8747(13) . ? 
Al1 O2 1.8842(13) . ? 
Al2 O16 1.8617(14) . ? 
Al2 O17 1.8646(13) . ? 
Al2 O15 1.8705(14) . ? 
Al2 O18 1.8706(13) . ? 
Al2 O14 1.8719(13) . ? 
Al2 O13 1.8739(13) . ? 
O1 C1 1.425(2) . ? 
O1 B1 1.491(2) . ? 
O2 C2 1.437(2) . ? 
O2 B1 1.492(2) . ? 
O3 C3 1.430(2) . ? 
O3 B2 1.492(3) . ? 
O4 C4 1.438(2) . ? 
O4 B2 1.504(3) . ? 
O5 C5 1.439(2) . ? 
O5 B3 1.492(2) . ? 
O6 C6 1.428(2) . ? 
O6 B3 1.492(3) . ? 
O7 C13 1.379(2) . ? 
O7 B1 1.447(2) . ? 
O8 C18 1.366(2) . ? 
O8 B1 1.452(2) . ? 
O9 C19 1.375(2) . ? 
O9 B2 1.445(3) . ? 
O10 C24 1.378(2) . ? 
O10 B2 1.450(3) . ? 
O11 C25 1.373(2) . ? 
O11 B3 1.453(3) . ? 
O12 C30 1.373(2) . ? 
O12 B3 1.448(3) . ? 
O13 C7 1.434(2) . ? 
O13 B4 1.491(2) . ? 
O14 C8 1.440(2) . ? 
O14 B4 1.498(2) . ? 
O15 C9 1.426(2) . ? 
O15 B5 1.500(3) . ? 
O16 C10 1.432(2) . ? 
O16 B5 1.495(3) . ? 
O17 C11 1.427(2) . ? 
O17 B6 1.490(2) . ? 
O18 C12 1.435(2) . ? 
O18 B6 1.498(2) . ? 
O19 C31 1.377(2) . ? 
O19 B4 1.449(2) . ? 
O20 C36 1.372(2) . ? 
O20 B4 1.451(2) . ? 
O21 C37 1.370(2) . ? 
O21 B5 1.443(3) . ? 
O22 C42 1.376(2) . ? 
O22 B5 1.443(3) . ? 
O23 C43 1.386(2) . ? 
O23 B6 1.442(3) . ? 
O24 C48 1.374(2) . ? 
O24 B6 1.451(2) . ? 
C52 C50 1.201(7) . ? 
C52 H52A 0.9800 . ? 
C52 H52B 0.9800 . ? 
C52 H52C 0.9800 . ? 
C1 H1A 0.9800 . ? 
C1 H1B 0.9800 . ? 
C1 H1C 0.9800 . ? 
C2 H2A 0.9800 . ? 
C2 H2B 0.9800 . ? 
C2 H2C 0.9800 . ? 
C3 H3A 0.9800 . ? 
C3 H3B 0.9800 . ? 
C3 H3C 0.9800 . ? 
C4 H4A 0.9800 . ? 
C4 H4B 0.9800 . ? 
C4 H4C 0.9800 . ? 
C5 H5A 0.9800 . ? 
C5 H5B 0.9800 . ? 
C5 H5C 0.9800 . ? 
C6 H6A 0.9800 . ? 
C6 H6B 0.9800 . ? 
C6 H6C 0.9800 . ? 
C7 H7A 0.9800 . ? 
C7 H7B 0.9800 . ? 
C7 H7C 0.9800 . ? 
C8 H8A 0.9800 . ? 
C8 H8B 0.9800 . ? 
C8 H8C 0.9800 . ? 
C9 H9A 0.9800 . ? 
C9 H9B 0.9800 . ? 
C9 H9C 0.9800 . ? 
C10 H10A 0.9800 . ? 
C10 H10B 0.9800 . ? 
C10 H10C 0.9800 . ? 
C11 H11A 0.9800 . ? 
C11 H11B 0.9800 . ? 
C11 H11C 0.9800 . ? 
C12 H12A 0.9800 . ? 
C12 H12B 0.9800 . ? 
C12 H12C 0.9800 . ? 
C13 C14 1.373(3) . ? 
C13 C18 1.388(3) . ? 
C14 C15 1.402(3) . ? 
C14 H14 0.9500 . ? 
C15 C16 1.374(3) . ? 
C15 H15 0.9500 . ? 
C16 C17 1.393(3) . ? 
C16 H16 0.9500 . ? 
C17 C18 1.372(3) . ? 
C17 H17 0.9500 . ? 
C19 C20 1.371(3) . ? 
C19 C24 1.391(3) . ? 
C20 C21 1.397(3) . ? 
C20 H20 0.9500 . ? 
C21 C22 1.383(3) . ? 
C21 H21 0.9500 . ? 
C22 C23 1.395(3) . ? 
C22 H22 0.9500 . ? 
C23 C24 1.369(3) . ? 
C23 H23 0.9500 . ? 
C25 C26 1.373(3) . ? 
C25 C30 1.385(3) . ? 
C26 C27 1.394(3) . ? 
C26 H26 0.9500 . ? 
C27 C28 1.376(3) . ? 
C27 H27 0.9500 . ? 
C28 C29 1.397(3) . ? 
C28 H28 0.9500 . ? 
C29 C30 1.377(3) . ? 
C29 H29 0.9500 . ? 
C31 C32 1.371(3) . ? 
C31 C36 1.384(3) . ? 
C32 C33 1.402(3) . ? 
C32 H32 0.9500 . ? 
C33 C34 1.376(3) . ? 
C33 H33 0.9500 . ? 
C34 C35 1.397(3) . ? 
C34 H34 0.9500 . ? 
C35 C36 1.370(3) . ? 
C35 H35 0.9500 . ? 
C37 C38 1.381(3) . ? 
C37 C42 1.383(3) . ? 
C38 C39 1.400(3) . ? 
C38 H38 0.9500 . ? 
C39 C40 1.373(4) . ? 
C39 H39 0.9500 . ? 
C40 C41 1.392(3) . ? 
C40 H40 0.9500 . ? 
C41 C42 1.368(3) . ? 
C41 H41 0.9500 . ? 
C43 C44 1.366(3) . ? 
C43 C48 1.383(3) . ? 
C44 C45 1.398(3) . ? 
C44 H44 0.9500 . ? 
C45 C46 1.364(4) . ? 
C45 H45 0.9500 . ? 
C46 C47 1.393(3) . ? 
C46 H46 0.9500 . ? 
C47 C48 1.375(3) . ? 
C47 H47 0.9500 . ? 
C49 C51 1.310(6) 2_566 ? 
C49 C50 1.398(6) . ? 
C49 H49 0.9500 . ? 
C50 C51 1.382(6) . ? 
C51 C49 1.310(6) 2_566 ? 
C51 H51 0.9500 . ? 
 
loop_ 
 _geom_angle_atom_site_label_1 
 _geom_angle_atom_site_label_2 
 _geom_angle_atom_site_label_3 
 _geom_angle 
 _geom_angle_site_symmetry_1 
 _geom_angle_site_symmetry_3 
 _geom_angle_publ_flag 
O1 Al1 O3 94.66(6) . . ? 
O1 Al1 O4 159.10(7) . . ? 
O3 Al1 O4 70.65(6) . . ? 
O1 Al1 O5 98.34(6) . . ? 
O3 Al1 O5 96.92(6) . . ? 
O4 Al1 O5 98.16(7) . . ? 
O1 Al1 O6 98.84(6) . . ? 
O3 Al1 O6 162.51(7) . . ? 
O4 Al1 O6 98.77(6) . . ? 
O5 Al1 O6 70.22(6) . . ? 
O1 Al1 O2 70.38(6) . . ? 
O3 Al1 O2 100.59(6) . . ? 
O4 Al1 O2 97.08(6) . . ? 
O5 Al1 O2 159.80(6) . . ? 
O6 Al1 O2 94.42(6) . . ? 
O16 Al2 O17 96.44(6) . . ? 
O16 Al2 O15 70.81(6) . . ? 
O17 Al2 O15 99.46(6) . . ? 
O16 Al2 O18 161.82(7) . . ? 
O17 Al2 O18 70.39(6) . . ? 
O15 Al2 O18 98.35(6) . . ? 
O16 Al2 O14 99.89(6) . . ? 
O17 Al2 O14 160.60(6) . . ? 
O15 Al2 O14 95.77(6) . . ? 
O18 Al2 O14 95.62(6) . . ? 
O16 Al2 O13 94.60(6) . . ? 
O17 Al2 O13 97.42(6) . . ? 
O15 Al2 O13 158.76(6) . . ? 
O18 Al2 O13 99.40(6) . . ? 
O14 Al2 O13 70.98(6) . . ? 
C1 O1 B1 123.38(16) . . ? 
C1 O1 Al1 137.89(13) . . ? 
B1 O1 Al1 98.68(11) . . ? 
C2 O2 B1 120.29(14) . . ? 
C2 O2 Al1 133.56(12) . . ? 
B1 O2 Al1 97.55(11) . . ? 
C3 O3 B2 121.66(15) . . ? 
C3 O3 Al1 139.08(13) . . ? 
B2 O3 Al1 98.94(11) . . ? 
C4 O4 B2 121.84(15) . . ? 
C4 O4 Al1 134.21(13) . . ? 
B2 O4 Al1 98.14(12) . . ? 
C5 O5 B3 121.68(15) . . ? 
C5 O5 Al1 137.44(12) . . ? 
B3 O5 Al1 98.66(11) . . ? 
C6 O6 B3 122.37(15) . . ? 
C6 O6 Al1 136.95(12) . . ? 
B3 O6 Al1 98.59(11) . . ? 
C13 O7 B1 105.87(14) . . ? 
C18 O8 B1 106.18(14) . . ? 
C19 O9 B2 105.80(15) . . ? 
C24 O10 B2 105.85(14) . . ? 
C25 O11 B3 105.89(15) . . ? 
C30 O12 B3 106.03(15) . . ? 
C7 O13 B4 121.12(15) . . ? 
C7 O13 Al2 136.07(12) . . ? 
B4 O13 Al2 97.73(10) . . ? 
C8 O14 B4 120.92(14) . . ? 
C8 O14 Al2 132.98(12) . . ? 
B4 O14 Al2 97.57(10) . . ? 
C9 O15 B5 121.56(15) . . ? 
C9 O15 Al2 135.25(12) . . ? 
B5 O15 Al2 98.08(11) . . ? 
C10 O16 B5 121.71(15) . . ? 
C10 O16 Al2 139.59(12) . . ? 
B5 O16 Al2 98.66(11) . . ? 
C11 O17 B6 123.18(15) . . ? 
C11 O17 Al2 136.35(12) . . ? 
B6 O17 Al2 98.95(10) . . ? 
C12 O18 B6 123.19(15) . . ? 
C12 O18 Al2 138.32(12) . . ? 
B6 O18 Al2 98.41(10) . . ? 
C31 O19 B4 105.81(14) . . ? 
C36 O20 B4 106.24(14) . . ? 
C37 O21 B5 106.02(15) . . ? 
C42 O22 B5 105.55(15) . . ? 
C43 O23 B6 105.93(14) . . ? 
C48 O24 B6 105.91(15) . . ? 
C50 C52 H52A 109.5 . . ? 
C50 C52 H52B 109.5 . . ? 
H52A C52 H52B 109.5 . . ? 
C50 C52 H52C 109.5 . . ? 
H52A C52 H52C 109.5 . . ? 
H52B C52 H52C 109.5 . . ? 
O1 C1 H1A 109.5 . . ? 
O1 C1 H1B 109.5 . . ? 
H1A C1 H1B 109.5 . . ? 
O1 C1 H1C 109.5 . . ? 
H1A C1 H1C 109.5 . . ? 
H1B C1 H1C 109.5 . . ? 
O2 C2 H2A 109.5 . . ? 
O2 C2 H2B 109.5 . . ? 
H2A C2 H2B 109.5 . . ? 
O2 C2 H2C 109.5 . . ? 
H2A C2 H2C 109.5 . . ? 
H2B C2 H2C 109.5 . . ? 
O3 C3 H3A 109.5 . . ? 
O3 C3 H3B 109.5 . . ? 
H3A C3 H3B 109.5 . . ? 
O3 C3 H3C 109.5 . . ? 
H3A C3 H3C 109.5 . . ? 
H3B C3 H3C 109.5 . . ? 
O4 C4 H4A 109.5 . . ? 
O4 C4 H4B 109.5 . . ? 
H4A C4 H4B 109.5 . . ? 
O4 C4 H4C 109.5 . . ? 
H4A C4 H4C 109.5 . . ? 
H4B C4 H4C 109.5 . . ? 
O5 C5 H5A 109.5 . . ? 
O5 C5 H5B 109.5 . . ? 
H5A C5 H5B 109.5 . . ? 
O5 C5 H5C 109.5 . . ? 
H5A C5 H5C 109.5 . . ? 
H5B C5 H5C 109.5 . . ? 
O6 C6 H6A 109.5 . . ? 
O6 C6 H6B 109.5 . . ? 
H6A C6 H6B 109.5 . . ? 
O6 C6 H6C 109.5 . . ? 
H6A C6 H6C 109.5 . . ? 
H6B C6 H6C 109.5 . . ? 
O13 C7 H7A 109.5 . . ? 
O13 C7 H7B 109.5 . . ? 
H7A C7 H7B 109.5 . . ? 
O13 C7 H7C 109.5 . . ? 
H7A C7 H7C 109.5 . . ? 
H7B C7 H7C 109.5 . . ? 
O14 C8 H8A 109.5 . . ? 
O14 C8 H8B 109.5 . . ? 
H8A C8 H8B 109.5 . . ? 
O14 C8 H8C 109.5 . . ? 
H8A C8 H8C 109.5 . . ? 
H8B C8 H8C 109.5 . . ? 
O15 C9 H9A 109.5 . . ? 
O15 C9 H9B 109.5 . . ? 
H9A C9 H9B 109.5 . . ? 
O15 C9 H9C 109.5 . . ? 
H9A C9 H9C 109.5 . . ? 
H9B C9 H9C 109.5 . . ? 
O16 C10 H10A 109.5 . . ? 
O16 C10 H10B 109.5 . . ? 
H10A C10 H10B 109.5 . . ? 
O16 C10 H10C 109.5 . . ? 
H10A C10 H10C 109.5 . . ? 
H10B C10 H10C 109.5 . . ? 
O17 C11 H11A 109.5 . . ? 
O17 C11 H11B 109.5 . . ? 
H11A C11 H11B 109.5 . . ? 
O17 C11 H11C 109.5 . . ? 
H11A C11 H11C 109.5 . . ? 
H11B C11 H11C 109.5 . . ? 
O18 C12 H12A 109.5 . . ? 
O18 C12 H12B 109.5 . . ? 
H12A C12 H12B 109.5 . . ? 
O18 C12 H12C 109.5 . . ? 
H12A C12 H12C 109.5 . . ? 
H12B C12 H12C 109.5 . . ? 
C14 C13 O7 128.17(18) . . ? 
C14 C13 C18 121.76(18) . . ? 
O7 C13 C18 110.06(16) . . ? 
C13 C14 C15 116.5(2) . . ? 
C13 C14 H14 121.8 . . ? 
C15 C14 H14 121.8 . . ? 
C16 C15 C14 121.9(2) . . ? 
C16 C15 H15 119.0 . . ? 
C14 C15 H15 119.0 . . ? 
C15 C16 C17 120.8(2) . . ? 
C15 C16 H16 119.6 . . ? 
C17 C16 H16 119.6 . . ? 
C18 C17 C16 117.5(2) . . ? 
C18 C17 H17 121.3 . . ? 
C16 C17 H17 121.3 . . ? 
O8 C18 C17 128.11(18) . . ? 
O8 C18 C13 110.35(16) . . ? 
C17 C18 C13 121.53(19) . . ? 
C20 C19 O9 128.21(17) . . ? 
C20 C19 C24 121.38(18) . . ? 
O9 C19 C24 110.41(16) . . ? 
C19 C20 C21 117.37(18) . . ? 
C19 C20 H20 121.3 . . ? 
C21 C20 H20 121.3 . . ? 
C22 C21 C20 120.94(18) . . ? 
C22 C21 H21 119.5 . . ? 
C20 C21 H21 119.5 . . ? 
C21 C22 C23 121.36(19) . . ? 
C21 C22 H22 119.3 . . ? 
C23 C22 H22 119.3 . . ? 
C24 C23 C22 117.12(18) . . ? 
C24 C23 H23 121.4 . . ? 
C22 C23 H23 121.4 . . ? 
C23 C24 O10 128.30(17) . . ? 
C23 C24 C19 121.82(17) . . ? 
O10 C24 C19 109.87(16) . . ? 
C26 C25 O11 127.99(18) . . ? 
C26 C25 C30 121.68(18) . . ? 
O11 C25 C30 110.33(16) . . ? 
C25 C26 C27 117.2(2) . . ? 
C25 C26 H26 121.4 . . ? 
C27 C26 H26 121.4 . . ? 
C28 C27 C26 121.10(19) . . ? 
C28 C27 H27 119.5 . . ? 
C26 C27 H27 119.5 . . ? 
C27 C28 C29 121.7(2) . . ? 
C27 C28 H28 119.2 . . ? 
C29 C28 H28 119.2 . . ? 
C30 C29 C28 116.6(2) . . ? 
C30 C29 H29 121.7 . . ? 
C28 C29 H29 121.7 . . ? 
O12 C30 C29 127.97(19) . . ? 
O12 C30 C25 110.32(16) . . ? 
C29 C30 C25 121.71(18) . . ? 
C32 C31 O19 127.71(17) . . ? 
C32 C31 C36 121.82(18) . . ? 
O19 C31 C36 110.47(16) . . ? 
C31 C32 C33 116.67(19) . . ? 
C31 C32 H32 121.7 . . ? 
C33 C32 H32 121.7 . . ? 
C34 C33 C32 121.56(19) . . ? 
C34 C33 H33 119.2 . . ? 
C32 C33 H33 119.2 . . ? 
C33 C34 C35 120.93(19) . . ? 
C33 C34 H34 119.5 . . ? 
C35 C34 H34 119.5 . . ? 
C36 C35 C34 117.22(19) . . ? 
C36 C35 H35 121.4 . . ? 
C34 C35 H35 121.4 . . ? 
C35 C36 O20 128.15(17) . . ? 
C35 C36 C31 121.77(18) . . ? 
O20 C36 C31 110.08(16) . . ? 
O21 C37 C38 127.85(19) . . ? 
O21 C37 C42 110.09(17) . . ? 
C38 C37 C42 122.05(19) . . ? 
C37 C38 C39 116.0(2) . . ? 
C37 C38 H38 122.0 . . ? 
C39 C38 H38 122.0 . . ? 
C40 C39 C38 121.6(2) . . ? 
C40 C39 H39 119.2 . . ? 
C38 C39 H39 119.2 . . ? 
C39 C40 C41 121.6(2) . . ? 
C39 C40 H40 119.2 . . ? 
C41 C40 H40 119.2 . . ? 
C42 C41 C40 116.9(2) . . ? 
C42 C41 H41 121.6 . . ? 
C40 C41 H41 121.6 . . ? 
C41 C42 O22 127.8(2) . . ? 
C41 C42 C37 121.8(2) . . ? 
O22 C42 C37 110.40(17) . . ? 
C44 C43 C48 121.92(19) . . ? 
C44 C43 O23 128.19(19) . . ? 
C48 C43 O23 109.90(16) . . ? 
C43 C44 C45 116.8(2) . . ? 
C43 C44 H44 121.6 . . ? 
C45 C44 H44 121.6 . . ? 
C46 C45 C44 121.4(2) . . ? 
C46 C45 H45 119.3 . . ? 
C44 C45 H45 119.3 . . ? 
C45 C46 C47 121.6(2) . . ? 
C45 C46 H46 119.2 . . ? 
C47 C46 H46 119.2 . . ? 
C48 C47 C46 116.8(2) . . ? 
C48 C47 H47 121.6 . . ? 
C46 C47 H47 121.6 . . ? 
O24 C48 C47 128.07(19) . . ? 
O24 C48 C43 110.50(16) . . ? 
C47 C48 C43 121.43(19) . . ? 
C51 C49 C50 123.5(5) 2_566 . ? 
C51 C49 H49 118.2 2_566 . ? 
C50 C49 H49 118.2 . . ? 
C52 C50 C51 114.2(6) . . ? 
C52 C50 C49 125.4(7) . . ? 
C51 C50 C49 120.4(5) . . ? 
C49 C51 C50 116.1(5) 2_566 . ? 
C49 C51 H51 122.0 2_566 . ? 
C50 C51 H51 122.0 . . ? 
O7 B1 O8 107.42(15) . . ? 
O7 B1 O1 112.61(16) . . ? 
O8 B1 O1 114.78(16) . . ? 
O7 B1 O2 116.32(16) . . ? 
O8 B1 O2 112.80(16) . . ? 
O1 B1 O2 92.65(14) . . ? 
O9 B2 O10 107.86(16) . . ? 
O9 B2 O3 113.76(16) . . ? 
O10 B2 O3 113.48(17) . . ? 
O9 B2 O4 114.84(17) . . ? 
O10 B2 O4 114.45(16) . . ? 
O3 B2 O4 92.04(14) . . ? 
O12 B3 O11 107.41(15) . . ? 
O12 B3 O5 113.74(17) . . ? 
O11 B3 O5 114.71(17) . . ? 
O12 B3 O6 114.89(17) . . ? 
O11 B3 O6 113.29(17) . . ? 
O5 B3 O6 92.52(14) . . ? 
O19 B4 O20 107.38(15) . . ? 
O19 B4 O13 113.66(15) . . ? 
O20 B4 O13 114.76(16) . . ? 
O19 B4 O14 115.30(16) . . ? 
O20 B4 O14 112.17(15) . . ? 
O13 B4 O14 93.36(14) . . ? 
O22 B5 O21 107.89(16) . . ? 
O22 B5 O16 114.39(17) . . ? 
O21 B5 O16 113.09(17) . . ? 
O22 B5 O15 114.40(17) . . ? 
O21 B5 O15 114.26(17) . . ? 
O16 B5 O15 92.41(14) . . ? 
O23 B6 O24 107.72(15) . . ? 
O23 B6 O17 115.46(16) . . ? 
O24 B6 O17 113.19(16) . . ? 
O23 B6 O18 113.70(16) . . ? 
O24 B6 O18 114.22(16) . . ? 
O17 B6 O18 92.19(13) . . ? 
 
loop_ 
 _geom_torsion_atom_site_label_1 
 _geom_torsion_atom_site_label_2 
 _geom_torsion_atom_site_label_3 
 _geom_torsion_atom_site_label_4 
 _geom_torsion 
 _geom_torsion_site_symmetry_1 
 _geom_torsion_site_symmetry_2 
 _geom_torsion_site_symmetry_3 
 _geom_torsion_site_symmetry_4 
 _geom_torsion_publ_flag 
O3 Al1 O1 C1 83.9(2) . . . . ? 
O4 Al1 O1 C1 127.9(2) . . . . ? 
O5 Al1 O1 C1 -13.9(2) . . . . ? 
O6 Al1 O1 C1 -85.0(2) . . . . ? 
O2 Al1 O1 C1 -176.6(2) . . . . ? 
O3 Al1 O1 B1 -93.60(11) . . . . ? 
O4 Al1 O1 B1 -49.5(2) . . . . ? 
O5 Al1 O1 B1 168.69(11) . . . . ? 
O6 Al1 O1 B1 97.56(11) . . . . ? 
O2 Al1 O1 B1 6.00(10) . . . . ? 
O1 Al1 O2 C2 -151.87(17) . . . . ? 
O3 Al1 O2 C2 -60.65(17) . . . . ? 
O4 Al1 O2 C2 10.89(17) . . . . ? 
O5 Al1 O2 C2 149.7(2) . . . . ? 
O6 Al1 O2 C2 110.31(16) . . . . ? 
O1 Al1 O2 B1 -5.97(10) . . . . ? 
O3 Al1 O2 B1 85.24(11) . . . . ? 
O4 Al1 O2 B1 156.79(10) . . . . ? 
O5 Al1 O2 B1 -64.4(2) . . . . ? 
O6 Al1 O2 B1 -103.80(11) . . . . ? 
O1 Al1 O3 C3 -4.9(2) . . . . ? 
O4 Al1 O3 C3 -169.7(2) . . . . ? 
O5 Al1 O3 C3 94.1(2) . . . . ? 
O6 Al1 O3 C3 135.6(3) . . . . ? 
O2 Al1 O3 C3 -75.8(2) . . . . ? 
O1 Al1 O3 B2 168.19(11) . . . . ? 
O4 Al1 O3 B2 3.44(11) . . . . ? 
O5 Al1 O3 B2 -92.81(12) . . . . ? 
O6 Al1 O3 B2 -51.3(3) . . . . ? 
O2 Al1 O3 B2 97.30(11) . . . . ? 
O1 Al1 O4 C4 157.4(2) . . . . ? 
O3 Al1 O4 C4 -155.4(2) . . . . ? 
O5 Al1 O4 C4 -60.84(19) . . . . ? 
O6 Al1 O4 C4 10.3(2) . . . . ? 
O2 Al1 O4 C4 105.87(19) . . . . ? 
O1 Al1 O4 B2 -50.7(2) . . . . ? 
O3 Al1 O4 B2 -3.41(11) . . . . ? 
O5 Al1 O4 B2 91.11(11) . . . . ? 
O6 Al1 O4 B2 162.21(11) . . . . ? 
O2 Al1 O4 B2 -102.18(11) . . . . ? 
O1 Al1 O5 C5 101.8(2) . . . . ? 
O3 Al1 O5 C5 6.0(2) . . . . ? 
O4 Al1 O5 C5 -65.4(2) . . . . ? 
O6 Al1 O5 C5 -161.8(2) . . . . ? 
O2 Al1 O5 C5 156.0(2) . . . . ? 
O1 Al1 O5 B3 -96.19(12) . . . . ? 
O3 Al1 O5 B3 168.04(12) . . . . ? 
O4 Al1 O5 B3 96.69(12) . . . . ? 
O6 Al1 O5 B3 0.26(11) . . . . ? 
O2 Al1 O5 B3 -42.0(2) . . . . ? 
O1 Al1 O6 C6 -67.2(2) . . . . ? 
O3 Al1 O6 C6 152.7(2) . . . . ? 
O4 Al1 O6 C6 101.4(2) . . . . ? 
O5 Al1 O6 C6 -163.0(2) . . . . ? 
O2 Al1 O6 C6 3.6(2) . . . . ? 
O1 Al1 O6 B3 95.48(12) . . . . ? 
O3 Al1 O6 B3 -44.6(3) . . . . ? 
O4 Al1 O6 B3 -95.83(12) . . . . ? 
O5 Al1 O6 B3 -0.26(11) . . . . ? 
O2 Al1 O6 B3 166.29(11) . . . . ? 
O16 Al2 O13 C7 112.11(18) . . . . ? 
O17 Al2 O13 C7 14.99(19) . . . . ? 
O15 Al2 O13 C7 157.4(2) . . . . ? 
O18 Al2 O13 C7 -56.26(19) . . . . ? 
O14 Al2 O13 C7 -149.01(19) . . . . ? 
O16 Al2 O13 B4 -94.69(11) . . . . ? 
O17 Al2 O13 B4 168.20(10) . . . . ? 
O15 Al2 O13 B4 -49.4(2) . . . . ? 
O18 Al2 O13 B4 96.95(11) . . . . ? 
O14 Al2 O13 B4 4.20(10) . . . . ? 
O16 Al2 O14 C8 -59.04(17) . . . . ? 
O17 Al2 O14 C8 154.07(19) . . . . ? 
O15 Al2 O14 C8 12.43(17) . . . . ? 
O18 Al2 O14 C8 111.44(16) . . . . ? 
O13 Al2 O14 C8 -150.53(17) . . . . ? 
O16 Al2 O14 B4 87.31(11) . . . . ? 
O17 Al2 O14 B4 -59.6(2) . . . . ? 
O15 Al2 O14 B4 158.78(11) . . . . ? 
O18 Al2 O14 B4 -102.21(11) . . . . ? 
O13 Al2 O14 B4 -4.18(10) . . . . ? 
O16 Al2 O15 C9 -151.92(19) . . . . ? 
O17 Al2 O15 C9 -58.35(19) . . . . ? 
O18 Al2 O15 C9 13.02(19) . . . . ? 
O14 Al2 O15 C9 109.59(18) . . . . ? 
O13 Al2 O15 C9 159.47(19) . . . . ? 
O16 Al2 O15 B5 1.46(11) . . . . ? 
O17 Al2 O15 B5 95.04(11) . . . . ? 
O18 Al2 O15 B5 166.41(11) . . . . ? 
O14 Al2 O15 B5 -97.02(11) . . . . ? 
O13 Al2 O15 B5 -47.1(2) . . . . ? 
O17 Al2 O16 C10 83.3(2) . . . . ? 
O15 Al2 O16 C10 -178.9(2) . . . . ? 
O18 Al2 O16 C10 125.7(2) . . . . ? 
O14 Al2 O16 C10 -86.18(19) . . . . ? 
O13 Al2 O16 C10 -14.7(2) . . . . ? 
O17 Al2 O16 B5 -99.28(11) . . . . ? 
O15 Al2 O16 B5 -1.47(11) . . . . ? 
O18 Al2 O16 B5 -56.9(2) . . . . ? 
O14 Al2 O16 B5 91.24(11) . . . . ? 
O13 Al2 O16 B5 162.71(11) . . . . ? 
O16 Al2 O17 C11 3.4(2) . . . . ? 
O15 Al2 O17 C11 -68.1(2) . . . . ? 
O18 Al2 O17 C11 -163.7(2) . . . . ? 
O14 Al2 O17 C11 150.6(2) . . . . ? 
O13 Al2 O17 C11 98.9(2) . . . . ? 
O16 Al2 O17 B6 168.79(11) . . . . ? 
O15 Al2 O17 B6 97.25(11) . . . . ? 
O18 Al2 O17 B6 1.69(10) . . . . ? 
O14 Al2 O17 B6 -44.0(2) . . . . ? 
O13 Al2 O17 B6 -95.70(11) . . . . ? 
O16 Al2 O18 C12 129.9(2) . . . . ? 
O17 Al2 O18 C12 175.2(2) . . . . ? 
O15 Al2 O18 C12 78.04(19) . . . . ? 
O14 Al2 O18 C12 -18.65(19) . . . . ? 
O13 Al2 O18 C12 -90.25(19) . . . . ? 
O16 Al2 O18 B6 -47.0(2) . . . . ? 
O17 Al2 O18 B6 -1.68(10) . . . . ? 
O15 Al2 O18 B6 -98.80(11) . . . . ? 
O14 Al2 O18 B6 164.51(11) . . . . ? 
O13 Al2 O18 B6 92.91(11) . . . . ? 
B1 O7 C13 C14 175.2(2) . . . . ? 
B1 O7 C13 C18 -3.6(2) . . . . ? 
O7 C13 C14 C15 179.43(19) . . . . ? 
C18 C13 C14 C15 -1.8(3) . . . . ? 
C13 C14 C15 C16 -0.7(3) . . . . ? 
C14 C15 C16 C17 1.8(4) . . . . ? 
C15 C16 C17 C18 -0.3(3) . . . . ? 
B1 O8 C18 C17 179.7(2) . . . . ? 
B1 O8 C18 C13 -1.1(2) . . . . ? 
C16 C17 C18 O8 176.91(18) . . . . ? 
C16 C17 C18 C13 -2.2(3) . . . . ? 
C14 C13 C18 O8 -175.88(18) . . . . ? 
O7 C13 C18 O8 3.1(2) . . . . ? 
C14 C13 C18 C17 3.4(3) . . . . ? 
O7 C13 C18 C17 -177.68(17) . . . . ? 
B2 O9 C19 C20 176.5(2) . . . . ? 
B2 O9 C19 C24 -3.6(2) . . . . ? 
O9 C19 C20 C21 178.87(18) . . . . ? 
C24 C19 C20 C21 -1.0(3) . . . . ? 
C19 C20 C21 C22 0.6(3) . . . . ? 
C20 C21 C22 C23 0.2(3) . . . . ? 
C21 C22 C23 C24 -0.5(3) . . . . ? 
C22 C23 C24 O10 179.78(18) . . . . ? 
C22 C23 C24 C19 0.1(3) . . . . ? 
B2 O10 C24 C23 -177.80(19) . . . . ? 
B2 O10 C24 C19 1.9(2) . . . . ? 
C20 C19 C24 C23 0.7(3) . . . . ? 
O9 C19 C24 C23 -179.18(17) . . . . ? 
C20 C19 C24 O10 -179.03(17) . . . . ? 
O9 C19 C24 O10 1.0(2) . . . . ? 
B3 O11 C25 C26 179.5(2) . . . . ? 
B3 O11 C25 C30 -0.9(2) . . . . ? 
O11 C25 C26 C27 -179.82(19) . . . . ? 
C30 C25 C26 C27 0.6(3) . . . . ? 
C25 C26 C27 C28 -0.6(3) . . . . ? 
C26 C27 C28 C29 0.0(3) . . . . ? 
C27 C28 C29 C30 0.5(3) . . . . ? 
B3 O12 C30 C29 -179.5(2) . . . . ? 
B3 O12 C30 C25 0.8(2) . . . . ? 
C28 C29 C30 O12 179.8(2) . . . . ? 
C28 C29 C30 C25 -0.5(3) . . . . ? 
C26 C25 C30 O12 179.65(18) . . . . ? 
O11 C25 C30 O12 0.0(2) . . . . ? 
C26 C25 C30 C29 -0.1(3) . . . . ? 
O11 C25 C30 C29 -179.69(18) . . . . ? 
B4 O19 C31 C32 178.85(19) . . . . ? 
B4 O19 C31 C36 -0.6(2) . . . . ? 
O19 C31 C32 C33 178.86(18) . . . . ? 
C36 C31 C32 C33 -1.7(3) . . . . ? 
C31 C32 C33 C34 0.7(3) . . . . ? 
C32 C33 C34 C35 0.6(3) . . . . ? 
C33 C34 C35 C36 -1.0(3) . . . . ? 
C34 C35 C36 O20 179.53(18) . . . . ? 
C34 C35 C36 C31 0.0(3) . . . . ? 
B4 O20 C36 C35 179.04(19) . . . . ? 
B4 O20 C36 C31 -1.42(19) . . . . ? 
C32 C31 C36 C35 1.4(3) . . . . ? 
O19 C31 C36 C35 -179.10(17) . . . . ? 
C32 C31 C36 O20 -178.18(17) . . . . ? 
O19 C31 C36 O20 1.3(2) . . . . ? 
B5 O21 C37 C38 178.8(2) . . . . ? 
B5 O21 C37 C42 -2.2(2) . . . . ? 
O21 C37 C38 C39 178.02(19) . . . . ? 
C42 C37 C38 C39 -0.9(3) . . . . ? 
C37 C38 C39 C40 0.0(3) . . . . ? 
C38 C39 C40 C41 0.5(3) . . . . ? 
C39 C40 C41 C42 -0.1(3) . . . . ? 
C40 C41 C42 O22 -179.5(2) . . . . ? 
C40 C41 C42 C37 -0.8(3) . . . . ? 
B5 O22 C42 C41 179.2(2) . . . . ? 
B5 O22 C42 C37 0.3(2) . . . . ? 
O21 C37 C42 C41 -177.77(19) . . . . ? 
C38 C37 C42 C41 1.3(3) . . . . ? 
O21 C37 C42 O22 1.2(2) . . . . ? 
C38 C37 C42 O22 -179.71(18) . . . . ? 
B6 O23 C43 C44 -177.5(2) . . . . ? 
B6 O23 C43 C48 2.3(2) . . . . ? 
C48 C43 C44 C45 1.7(3) . . . . ? 
O23 C43 C44 C45 -178.48(18) . . . . ? 
C43 C44 C45 C46 0.1(3) . . . . ? 
C44 C45 C46 C47 -1.4(4) . . . . ? 
C45 C46 C47 C48 0.8(3) . . . . ? 
B6 O24 C48 C47 -179.35(19) . . . . ? 
B6 O24 C48 C43 0.0(2) . . . . ? 
C46 C47 C48 O24 -179.82(18) . . . . ? 
C46 C47 C48 C43 0.9(3) . . . . ? 
C44 C43 C48 O24 178.40(17) . . . . ? 
O23 C43 C48 O24 -1.5(2) . . . . ? 
C44 C43 C48 C47 -2.2(3) . . . . ? 
O23 C43 C48 C47 177.89(17) . . . . ? 
C51 C49 C50 C52 -180.0(5) 2_566 . . . ? 
C51 C49 C50 C51 0.5(7) 2_566 . . . ? 
C52 C50 C51 C49 180.0(5) . . . 2_566 ? 
C49 C50 C51 C49 -0.4(6) . . . 2_566 ? 
C13 O7 B1 O8 2.90(19) . . . . ? 
C13 O7 B1 O1 -124.44(16) . . . . ? 
C13 O7 B1 O2 130.37(16) . . . . ? 
C18 O8 B1 O7 -1.1(2) . . . . ? 
C18 O8 B1 O1 124.93(17) . . . . ? 
C18 O8 B1 O2 -130.63(16) . . . . ? 
C1 O1 B1 O7 54.9(2) . . . . ? 
Al1 O1 B1 O7 -127.15(14) . . . . ? 
C1 O1 B1 O8 -68.4(2) . . . . ? 
Al1 O1 B1 O8 109.51(15) . . . . ? 
C1 O1 B1 O2 174.90(16) . . . . ? 
Al1 O1 B1 O2 -7.14(12) . . . . ? 
C2 O2 B1 O7 -84.2(2) . . . . ? 
Al1 O2 B1 O7 123.92(15) . . . . ? 
C2 O2 B1 O8 40.6(2) . . . . ? 
Al1 O2 B1 O8 -111.31(14) . . . . ? 
C2 O2 B1 O1 158.96(15) . . . . ? 
Al1 O2 B1 O1 7.03(12) . . . . ? 
C19 O9 B2 O10 4.7(2) . . . . ? 
C19 O9 B2 O3 -122.10(17) . . . . ? 
C19 O9 B2 O4 133.62(17) . . . . ? 
C24 O10 B2 O9 -4.1(2) . . . . ? 
C24 O10 B2 O3 122.87(16) . . . . ? 
C24 O10 B2 O4 -133.24(17) . . . . ? 
C3 O3 B2 O9 52.3(3) . . . . ? 
Al1 O3 B2 O9 -122.39(15) . . . . ? 
C3 O3 B2 O10 -71.5(2) . . . . ? 
Al1 O3 B2 O10 113.80(15) . . . . ? 
C3 O3 B2 O4 170.67(17) . . . . ? 
Al1 O3 B2 O4 -4.04(13) . . . . ? 
C4 O4 B2 O9 -81.9(2) . . . . ? 
Al1 O4 B2 O9 121.44(16) . . . . ? 
C4 O4 B2 O10 43.6(3) . . . . ? 
Al1 O4 B2 O10 -113.00(16) . . . . ? 
C4 O4 B2 O3 160.63(17) . . . . ? 
Al1 O4 B2 O3 4.01(13) . . . . ? 
C30 O12 B3 O11 -1.4(2) . . . . ? 
C30 O12 B3 O5 126.70(17) . . . . ? 
C30 O12 B3 O6 -128.40(17) . . . . ? 
C25 O11 B3 O12 1.4(2) . . . . ? 
C25 O11 B3 O5 -126.13(17) . . . . ? 
C25 O11 B3 O6 129.34(16) . . . . ? 
C5 O5 B3 O12 -75.8(2) . . . . ? 
Al1 O5 B3 O12 118.36(15) . . . . ? 
C5 O5 B3 O11 48.4(3) . . . . ? 
Al1 O5 B3 O11 -117.43(15) . . . . ? 
C5 O5 B3 O6 165.51(17) . . . . ? 
Al1 O5 B3 O6 -0.31(13) . . . . ? 
C6 O6 B3 O12 48.7(2) . . . . ? 
Al1 O6 B3 O12 -117.38(15) . . . . ? 
C6 O6 B3 O11 -75.3(2) . . . . ? 
Al1 O6 B3 O11 118.64(15) . . . . ? 
C6 O6 B3 O5 166.42(17) . . . . ? 
Al1 O6 B3 O5 0.31(13) . . . . ? 
C31 O19 B4 O20 -0.26(19) . . . . ? 
C31 O19 B4 O13 -128.30(16) . . . . ? 
C31 O19 B4 O14 125.57(16) . . . . ? 
C36 O20 B4 O19 1.03(19) . . . . ? 
C36 O20 B4 O13 128.43(16) . . . . ? 
C36 O20 B4 O14 -126.64(15) . . . . ? 
C7 O13 B4 O19 34.1(2) . . . . ? 
Al2 O13 B4 O19 -124.52(14) . . . . ? 
C7 O13 B4 O20 -90.1(2) . . . . ? 
Al2 O13 B4 O20 111.34(15) . . . . ? 
C7 O13 B4 O14 153.60(16) . . . . ? 
Al2 O13 B4 O14 -4.97(12) . . . . ? 
C8 O14 B4 O19 -85.0(2) . . . . ? 
Al2 O14 B4 O19 123.17(14) . . . . ? 
C8 O14 B4 O20 38.3(2) . . . . ? 
Al2 O14 B4 O20 -113.51(14) . . . . ? 
C8 O14 B4 O13 156.78(15) . . . . ? 
Al2 O14 B4 O13 4.98(12) . . . . ? 
C42 O22 B5 O21 -1.7(2) . . . . ? 
C42 O22 B5 O16 125.11(17) . . . . ? 
C42 O22 B5 O15 -130.03(17) . . . . ? 
C37 O21 B5 O22 2.4(2) . . . . ? 
C37 O21 B5 O16 -125.17(17) . . . . ? 
C37 O21 B5 O15 130.81(17) . . . . ? 
C10 O16 B5 O22 -62.0(2) . . . . ? 
Al2 O16 B5 O22 119.97(15) . . . . ? 
C10 O16 B5 O21 62.1(2) . . . . ? 
Al2 O16 B5 O21 -115.98(15) . . . . ? 
C10 O16 B5 O15 179.77(15) . . . . ? 
Al2 O16 B5 O15 1.74(13) . . . . ? 
C9 O15 B5 O22 38.3(2) . . . . ? 
Al2 O15 B5 O22 -119.95(15) . . . . ? 
C9 O15 B5 O21 -86.7(2) . . . . ? 
Al2 O15 B5 O21 114.99(15) . . . . ? 
C9 O15 B5 O16 156.56(16) . . . . ? 
Al2 O15 B5 O16 -1.72(12) . . . . ? 
C43 O23 B6 O24 -2.31(19) . . . . ? 
C43 O23 B6 O17 -129.90(16) . . . . ? 
C43 O23 B6 O18 125.32(16) . . . . ? 
C48 O24 B6 O23 1.45(19) . . . . ? 
C48 O24 B6 O17 130.34(16) . . . . ? 
C48 O24 B6 O18 -125.87(16) . . . . ? 
C11 O17 B6 O23 48.4(2) . . . . ? 
Al2 O17 B6 O23 -119.61(14) . . . . ? 
C11 O17 B6 O24 -76.4(2) . . . . ? 
Al2 O17 B6 O24 115.59(14) . . . . ? 
C11 O17 B6 O18 165.99(17) . . . . ? 
Al2 O17 B6 O18 -1.99(12) . . . . ? 
C12 O18 B6 O23 -56.4(2) . . . . ? 
Al2 O18 B6 O23 121.09(14) . . . . ? 
C12 O18 B6 O24 67.8(2) . . . . ? 
Al2 O18 B6 O24 -114.72(15) . . . . ? 
C12 O18 B6 O17 -175.51(16) . . . . ? 
Al2 O18 B6 O17 1.98(12) . . . . ? 
 
_diffrn_measured_fraction_theta_max    0.997 
_diffrn_reflns_theta_full              26.38 
_diffrn_measured_fraction_theta_full   0.997 
_refine_diff_density_max    0.384 
_refine_diff_density_min   -0.303 
_refine_diff_density_rms    0.045 
# ===== < END of CIF >
